# Supplementary material
Source: publisher site journal article supplement (https://www.dovepress.com/get_supplementary_file.php?f=371026.xlsx)
Supplement: Supplementary file 1 [file get_supplementary_file.php]

## Sheet: supplementary table1
Symbol	logFC	AveExpr	t	P.Value	adj.P.Val	B
DMXL2	1.62606	4.63522	20.9903	1.37929e-05	0.10249	4.06618
CD58	1.22808	4.13838	17.1804	3.30494e-05	0.10249	3.34797
HNRNPLL	1.20042	3.28614	15.9908	4.51544e-05	0.105134	3.06997
CAPZA2	1.06562	4.12049	15.8181	4.73365e-05	0.105134	3.02702
TMOD2	1.09617	2.57161	14.3294	7.26713e-05	0.108468	2.62666
WDR49	1.07645	1.04496	13.9634	8.12831e-05	0.108468	2.51916
CBWD3	1.29104	2.90281	12.0114	0.000155605	0.121905	1.87461
Homo_sapiens_newGene_37307	1.49346	0.843343	11.2234	0.000208181	0.132535	1.57514
KCNE1	1.10082	1.17406	10.7578	0.00024954	0.135478	1.3858
LPGAT1	1.02656	3.88261	9.57926	0.000408851	0.152963	0.859849
USP15	1.11489	6.07453	9.02158	0.000526842	0.163955	0.584687
ST3GAL6	1.1362	3.19373	8.89958	0.000557956	0.164825	0.521992
MT-ND6	-1.50981	5.46532	-8.87928	0.000563347	0.164825	0.511472
P2RY14	1.0134	2.26449	8.4477	0.000694523	0.172457	0.281428
MAP2K4	1.11586	2.88994	8.22894	0.000775142	0.179326	0.160016
EVI2A	1.52598	4.2467	8.06804	0.000841771	0.179326	0.0685417
MT-ND2	-1.53006	8.79856	-8.0251	0.000860712	0.179326	0.0438138
C9orf72	1.29653	4.4442	8.02141	0.000862365	0.179326	0.0416801
CAPNS2	1.21182	1.34642	8.00204	0.000871099	0.179326	0.0304755
RP2	1.03833	3.53499	7.99682	0.000873471	0.179326	0.0274515
DHRS9	1.35492	3.15121	7.77527	0.000981801	0.185298	-0.102822
PDP1	1.13068	2.59795	7.5237	0.00112527	0.192277	-0.255382
FBXL5	1.00119	6.261	6.91093	0.00159634	0.230771	-0.649126
FBXO11	1.03573	3.96094	6.86971	0.00163589	0.23406	-0.676805
FGL2	1.50388	6.50611	6.6493	0.00186867	0.242801	-0.827537
CALM2	1.41193	6.02843	6.58936	0.00193876	0.243168	-0.869332
IL5RA	1.35345	2.14432	6.53751	0.00200198	0.243381	-0.905775
PARP9	1.32598	4.8879	6.51101	0.00203525	0.243381	-0.924504
MS4A6A	1.4201	4.67214	6.48911	0.00206325	0.243836	-0.940031
CBWD6	1.39904	2.04386	6.38489	0.00220304	0.251507	-1.0146
NPFF	1.17206	0.765992	6.33295	0.00227698	0.254025	-1.05218
MT-ATP6	-1.2581	6.5128	-6.16711	0.00253393	0.259427	-1.17404
SLC38A9	1.0012	2.37269	6.15523	0.00255363	0.259427	-1.18288
QKI	1.00738	4.06944	6.14125	0.00257708	0.259427	-1.19331
SAMD9L	1.69332	4.32362	6.08829	0.00266825	0.259427	-1.23299
OBSCN	-1.03353	1.57039	-6.0827	0.00267809	0.259427	-1.23719
CTTN	-1.16667	2.18064	-6.07903	0.00268459	0.259427	-1.23995
PRRG4	1.00399	2.10096	6.07793	0.00268654	0.259427	-1.24078
TUT7	1.00094	5.33357	6.0141	0.0028026	0.263048	-1.28909
AHR	1.16899	3.32341	5.89041	0.00304518	0.268917	-1.38398
MT-ND1	-1.41597	9.25435	-5.83382	0.00316456	0.271119	-1.42797
CYSLTR2	1.39445	1.90655	5.67861	0.00352205	0.279208	-1.55051
CBWD5	1.48814	2.87225	5.50831	0.00397173	0.284654	-1.68825
OXR1	1.04746	3.26484	5.49466	0.00401069	0.284654	-1.69945
IFIH1	1.31308	3.81745	5.46993	0.00408242	0.284654	-1.71979
CCNT2	1.13892	3.67437	5.45319	0.00413184	0.284654	-1.7336
SUMO4	1.056	2.07807	5.43617	0.00418283	0.284654	-1.74767
ZNF117	1.46934	3.0063	5.33	0.00451858	0.293945	-1.8363
CLEC2B	1.00756	3.85765	5.31783	0.00455908	0.293945	-1.84654
RWDD3	1.19763	0.989209	5.2864	0.00466573	0.296405	-1.8731
MT-ND5	-1.37772	7.92453	-5.28489	0.00467095	0.296405	-1.87438
ABHD3	1.00324	4.23269	5.2744	0.00470726	0.296552	-1.88328
SMCHD1	1.06376	6.48226	5.27045	0.00472099	0.296552	-1.88662
Homo_sapiens_newGene_56282	1.43503	1.67712	5.27022	0.00472182	0.296552	-1.88683
TNFSF13B	1.18339	4.06666	5.21123	0.00493318	0.302061	-1.93713
SGMS2	1.03697	2.17646	5.12835	0.00524966	0.307676	-2.00858
AKR1E2	-1.03926	1.52678	-5.07013	0.00548655	0.314652	-2.05931
TLR2	1.07249	4.23674	5.02995	0.00565751	0.319543	-2.09458
CYP27A1	1.08919	2.91333	4.99429	0.0058146	0.319543	-2.12607
WASHC4	1.25428	4.53443	4.97571	0.00589852	0.319543	-2.14255
MYL4	-1.54442	4.04568	-4.95536	0.00599209	0.319543	-2.16065
CHURC1	1.25369	3.67593	4.94367	0.00604666	0.319543	-2.17107
TNFSF10	1.15383	5.64436	4.92716	0.00612472	0.319543	-2.18582
DDX58	1.32528	4.45822	4.89795	0.00626577	0.319543	-2.21201
FAR1	1.19632	3.94848	4.8951	0.00627977	0.319543	-2.21458
TUBB1	-1.02465	5.42299	-4.88181	0.00634542	0.319543	-2.22654
Homo_sapiens_newGene_11973	-1.65165	2.69913	-4.83902	0.00656241	0.321295	-2.26521
C2orf88	-1.04985	2.35258	-4.81653	0.00668001	0.322862	-2.28564
MT-ND4	-1.24282	9.1639	-4.81522	0.00668691	0.322862	-2.28683
TMEM144	1.22155	1.28206	4.75538	0.00701269	0.330638	-2.34154
JAK2	1.28838	4.24519	4.70935	0.00727616	0.333613	-2.38397
STAT1	1.26648	6.01361	4.70671	0.00729161	0.333613	-2.38641
CASP1	1.10874	5.24903	4.68888	0.0073971	0.334664	-2.40293
CAVIN2	-1.15306	4.48502	-4.66966	0.00751291	0.338649	-2.4208
TENT5A	1.07496	2.7641	4.64415	0.0076699	0.340031	-2.44459
MIS18BP1	1.08191	3.41712	4.63015	0.00775769	0.340031	-2.45768
CPNE8	1.18352	1.80756	4.60267	0.00793359	0.340031	-2.48348
NRGN	-1.51577	6.30278	-4.49337	0.00868177	0.350759	-2.58713
MYOM2	-1.97261	1.46742	-4.46988	0.00885331	0.352273	-2.60964
PDE5A	-1.01756	2.06965	-4.43409	0.00912249	0.356025	-2.64408
MT-ATP8	-1.01309	9.05428	-4.38788	0.00948459	0.359314	-2.68884
ZBP1	1.19499	3.98099	4.35615	0.00974318	0.364114	-2.71977
PARP14	1.3692	5.22246	4.31288	0.0101093	0.372086	-2.76218
GMFB	1.01462	2.63353	4.29221	0.01029	0.372786	-2.78254
TIMM10	1.08601	2.26646	4.29112	0.0102996	0.372786	-2.78362
RB1	1.04173	3.27051	4.26814	0.0105052	0.374611	-2.80633
Homo_sapiens_newGene_38678	1.44081	0.758218	4.15439	0.0115972	0.379141	-2.91996
GBP1	1.57242	4.53167	4.15426	0.0115986	0.379141	-2.92009
IFITM3	1.22532	7.54553	4.14039	0.0117407	0.379916	-2.93408
FAM76B	1.01467	2.48154	4.12085	0.0119445	0.380338	-2.95385
SLC22A15	1.09335	3.06688	4.10244	0.0121403	0.380338	-2.97252
NABP1	1.31432	5.362	4.09943	0.0121728	0.380338	-2.97558
CLEC12A	1.36728	5.32362	4.08347	0.0123461	0.380338	-2.99181
Homo_sapiens_newGene_99714	1.18627	0.927179	4.07019	0.0124926	0.381032	-3.00536
SLC35A1	1.04748	2.81128	4.06739	0.0125238	0.381032	-3.00822
GUK1	-1.11612	6.82359	-4.06328	0.0125697	0.381478	-3.01242
LACTB	1.07376	3.22764	4.05382	0.012676	0.382803	-3.02209
DDX60L	1.01682	4.91995	4.03467	0.0128946	0.384684	-3.04172
TRIM22	1.06134	5.4768	4.00153	0.0132836	0.389979	-3.07582
GAPT	1.97425	3.67296	4.00039	0.0132972	0.389979	-3.07699
2021-03-01	1.35493	3.41417	3.92371	0.0142525	0.39999	-3.15657
ZNF429	1.02442	1.84125	3.91939	0.0143087	0.39999	-3.16108
ASAH1	1.05677	5.29448	3.89872	0.0145812	0.401506	-3.18271
SLC38A5	-1.54506	4.27298	-3.84605	0.0153034	0.407719	-3.23811
APOBEC3B	1.31902	1.89047	3.8393	0.0153991	0.408688	-3.24525
ESPN	-1.25896	2.34683	-3.821	0.0156617	0.41092	-3.26462
CCPG1	1.17069	4.14207	3.81858	0.0156969	0.41092	-3.26719
DPYD	1.00527	4.84934	3.79548	0.016037	0.412116	-3.29174
MILR1	1.2945	2.66936	3.77274	0.0163801	0.415127	-3.31597
KDM7A	1.13471	3.51144	3.73884	0.0169079	0.419947	-3.35227
CTDSPL	-1.03265	1.24645	-3.73056	0.0170397	0.420278	-3.36115
MT-CO2	-1.05813	9.11522	-3.72239	0.0171711	0.421437	-3.36994
PDK4	1.93585	2.75893	3.70942	0.0173821	0.422549	-3.38391
MCTP1	1.09098	3.50298	3.70682	0.0174248	0.422745	-3.38672
MT-CYB	-1.09911	8.15383	-3.68353	0.0178124	0.426281	-3.41187
AGFG1	1.01928	2.99334	3.68119	0.0178518	0.426474	-3.4144
SPARC	-1.07691	3.83117	-3.6633	0.0181573	0.430262	-3.4338
MS4A14	1.40564	2.54486	3.66046	0.0182063	0.430599	-3.43689
SAMD9	1.2117	4.43636	3.63924	0.0185777	0.433707	-3.45996
MT-ND4L	-1.01236	7.89561	-3.6001	0.0192861	0.440242	-3.50271
ETV7	1.42039	1.28329	3.56634	0.0199227	0.446405	-3.53979
OAS1	1.61014	4.77419	3.54439	0.0203498	0.448562	-3.56399
AZI2	1.21446	2.68407	3.52408	0.0207544	0.451917	-3.58645
ADORA3	1.02948	1.23787	3.48098	0.0216448	0.455613	-3.63435
EPSTI1	1.64812	3.43465	3.47832	0.0217012	0.455613	-3.63731
PF4	-1.41679	5.91333	-3.46928	0.021894	0.456392	-3.64739
SLC25A24	1.17107	2.79811	3.44172	0.0224946	0.459276	-3.67822
HBS1L	1.02579	2.65775	3.42889	0.0227808	0.461072	-3.69262
SERPING1	1.16017	2.57139	3.40477	0.0233302	0.461165	-3.71975
USP8	1.08781	3.02641	3.40447	0.023337	0.461165	-3.72008
IDI1	1.31133	2.787	3.3796	0.02392	0.463275	-3.74815
S100A10	1.16806	5.53962	3.37017	0.0241456	0.463275	-3.75883
KCTD12	1.29627	4.35306	3.35059	0.0246215	0.464351	-3.78102
CD86	1.13977	2.96611	3.34869	0.0246684	0.464351	-3.78318
PHF11	1.02907	4.01021	3.33958	0.024894	0.465309	-3.79353
Homo_sapiens_newGene_56516	1.30217	1.93202	3.33864	0.0249175	0.465309	-3.7946
DDX60	1.48149	3.24368	3.32187	0.0253397	0.466	-3.81369
GP9	-1.12599	2.68698	-3.30801	0.0256949	0.466643	-3.82951
VPS29	1.09327	3.77243	3.27667	0.0265194	0.468198	-3.86536
LSM8	1.13334	2.97979	3.2725	0.0266314	0.468198	-3.87015
TLR6	1.03745	4.54117	3.26067	0.0269524	0.469068	-3.88374
CD164	1.22141	4.30191	3.25911	0.0269948	0.469068	-3.88552
TMCO1	1.00083	3.02956	3.24641	0.027345	0.470627	-3.90015
Homo_sapiens_newGene_1970	-1.88751	0.943755	-3.24156	0.02748	0.471039	-3.90573
RTP4	1.07948	2.24094	3.23528	0.0276559	0.471039	-3.91297
GLIPR1	1.04862	4.67943	3.22945	0.0278205	0.471715	-3.91969
C4orf33	1.03719	1.80657	3.21145	0.0283359	0.472955	-3.9405
SLFN12	1.01428	2.22935	3.18311	0.0291697	0.477639	-3.97335
MYLK	-1.20461	2.07032	-3.16853	0.0296097	0.479069	-3.99029
TMEM167A	1.00266	3.52371	3.1621	0.0298062	0.479819	-3.99778
IFI16	1.09392	6.07304	3.14485	0.0303407	0.481482	-4.01789
STARD4	1.03216	2.06173	3.12284	0.0310391	0.483437	-4.04362
PRDX6	-1.30634	5.83548	-3.10258	0.0316981	0.486286	-4.06736
AIM2	1.14725	2.33451	3.08653	0.0322316	0.487283	-4.08621
SNAPC3	1.0985	3.16008	3.08335	0.0323385	0.488283	-4.08996
HBA1	-1.06898	16.1693	-3.0745	0.0326384	0.489077	-4.10038
ITGA4	1.2031	5.84704	3.06173	0.0330765	0.491354	-4.11543
RAB12	1.04081	2.34612	3.03524	0.0340073	0.495315	-4.14673
NQO2	1.27981	3.49561	3.02517	0.034369	0.496108	-4.15866
MT-CO3	-1.06127	9.2495	-3.01993	0.034559	0.496362	-4.16487
AL031281.2	3.57869	3.02502	3.0159	0.0347057	0.496505	-4.16964
CLEC4E	1.17382	4.35822	3.01116	0.0348796	0.497174	-4.17527
LAP3	1.57076	3.91848	2.98335	0.0359188	0.49804	-4.20833
LMO2	1.05893	4.0665	2.9821	0.0359663	0.49804	-4.20982
SRP9	1.04868	4.29307	2.96127	0.0367695	0.498378	-4.23467
TFEC	1.20702	2.35174	2.92113	0.0383756	0.504301	-4.28273
MGST1	1.17886	2.16877	2.91677	0.0385548	0.504301	-4.28796
ZNF66	1.27371	3.30164	2.91257	0.0387285	0.505036	-4.293
TMX1	1.0955	2.74733	2.91081	0.0388013	0.505036	-4.29511
PPBP	-1.43561	7.05428	-2.91033	0.0388214	0.505036	-4.2957
DHRSX	1.04203	2.2737	2.90756	0.0389364	0.505187	-4.29902
CASP7	1.01094	2.14405	2.89994	0.0392559	0.506635	-4.30819
LYZ	1.45884	9.48211	2.88224	0.0400086	0.507399	-4.3295
CCDC88A	1.03644	2.92421	2.88105	0.0400598	0.507399	-4.33093
HEXB	1.14861	3.98074	2.83911	0.0419132	0.516132	-4.38162
SCPEP1	1.1304	4.05888	2.81344	0.0430955	0.519675	-4.41275
TMEM158	-1.70563	1.42935	-2.79357	0.0440369	0.524812	-4.43691
S1PR3	1.21805	1.95323	2.78656	0.0443742	0.526388	-4.44544
IFIT5	1.34473	3.26367	2.78599	0.044402	0.526388	-4.44614
FMN1	1.26101	1.67663	2.76399	0.0454816	0.530242	-4.47297
AP1S2	1.12302	4.50947	2.75383	0.0459904	0.530912	-4.48539
LARP7	1.0796	2.63517	2.74952	0.0462078	0.531638	-4.49065
BLVRA	1.33988	3.27035	2.74643	0.0463645	0.531638	-4.49443
MXRA7	1.0779	1.53419	2.69831	0.0488862	0.538961	-4.55344
VCAN	1.39698	5.96141	2.68899	0.049392	0.541849	-4.5649

## Sheet: supplementary table2
Symbol	logFC	AveExpr	t	P.Value	adj.P.Val	B
MSTRG.105426.29	-1.77121	0.94466	-40.6673	3.42825e-07	0.0108024	4.19218
ACAP2-IT1	1.2201	2.26346	22.0457	6.08337e-06	0.0479218	3.48145
MSTRG.188541.29	1.05136	0.525678	19.2617	1.14352e-05	0.055541	3.22022
MSTRG.82017.21	-1.3864	0.693199	-18.9505	1.23385e-05	0.055541	3.18561
MSTRG.121732.25	1.03104	2.14254	18.0061	1.56611e-05	0.0616852	3.07255
AC009032.1	1.06998	2.42768	13.8939	5.22093e-05	0.086585	2.39339
MSTRG.92440.1	1.02255	0.511277	12.2301	9.4005e-05	0.0941027	1.99537
MSTRG.78348.30	1.10809	0.603486	11.2955	0.000135359	0.106629	1.72742
MSTRG.63175.1	-1.11835	0.559177	-11.0227	0.000151373	0.110795	1.64209
MSTRG.38840.33	1.40646	0.811445	10.7355	0.000170759	0.111343	1.54852
AC023830.3	-1.00749	0.62676	-9.70104	0.00027063	0.119061	1.17606
MSTRG.46378.31	1.01549	0.527962	9.54184	0.000291668	0.119061	1.11336
MSTRG.201110.36	2.27065	1.32761	9.46707	0.000302224	0.119061	1.08337
MSTRG.78859.6	-1.00815	0.62886	-9.13606	0.00035486	0.119061	0.946372
MSTRG.69521.33	1.9885	0.994248	9.00252	0.000379177	0.119061	0.889064
AC007336.1	1.10856	1.70868	8.97611	0.00038422	0.119061	0.877589
MSTRG.11138.13	-1.73573	1.00059	-8.79719	0.000420594	0.124842	0.798569
MSTRG.82397.25	-1.53259	1.208	-8.74431	0.000432127	0.124842	0.774783
MSTRG.211886.13	-1.26967	0.634836	-8.56269	0.000474738	0.124842	0.691556
MSTRG.121534.32	-1.61324	5.44226	-8.49986	0.000490644	0.124937	0.662194
MSTRG.179113.8	1.01054	2.49356	8.40529	0.000515805	0.124937	0.617449
MSTRG.101397.9	1.09064	1.20137	8.36253	0.000527688	0.125572	0.596993
MSTRG.39853.13	1.46359	0.731796	7.83366	0.00070567	0.138973	0.331936
MSTRG.126066.49	1.56253	0.781264	7.66021	0.000779181	0.140456	0.239914
AL157394.1	1.11091	2.6925	7.52989	0.000840499	0.141626	0.169028
MSTRG.205016.57	1.01448	1.88803	7.36013	0.000929274	0.145587	0.0743641
AP001033.2	1.17389	2.71422	7.26995	0.000980989	0.146498	0.0229799
MSTRG.77799.1	1.15181	1.59218	6.74698	0.00135895	0.157606	-0.290816
MSTRG.204683.20	1.37879	0.689393	6.42662	0.00167707	0.173459	-0.497231
MSTRG.66918.11	1.71544	0.857719	6.33804	0.00178022	0.173667	-0.556325
MSTRG.151055.39	2.05663	1.02831	6.3194	0.00180287	0.17386	-0.568875
MSTRG.188821.14	1.03805	2.18478	6.19063	0.00196916	0.176438	-0.656692
MSTRG.87985.20	1.11671	1.6499	6.18876	0.00197171	0.176438	-0.657984
AC103691.1	1.17582	2.12698	5.72356	0.00274726	0.183507	-0.992155
AC110792.3	1.2062	2.49569	5.70552	0.00278402	0.183507	-1.00567
MSTRG.46378.44	-1.14854	0.787559	-5.68693	0.00282251	0.183507	-1.01964
MSTRG.57685.9	1.16738	2.39655	5.68318	0.00283035	0.183507	-1.02246
MSTRG.152410.1	-1.09153	0.789072	-5.62305	0.00295966	0.18596	-1.06798
MSTRG.70823.3	1.02484	0.64834	5.47972	0.00329724	0.193594	-1.17845
AP000240.1	1.26857	1.46251	5.43245	0.00341846	0.193594	-1.21549
AC068790.2	1.05433	1.67229	5.34089	0.00366859	0.197557	-1.28813
MSTRG.54962.12	1.92579	1.84347	5.21038	0.00406362	0.201452	-1.3937
MSTRG.14761.16	1.14536	1.52496	5.0996	0.00443889	0.205901	-1.48524
MSTRG.195736.5	1.14038	3.294	5.02418	0.00471789	0.210866	-1.54859
MSTRG.219890.11	1.60264	0.93794	4.98907	0.00485478	0.21217	-1.57836
PSMD6-AS2	1.01372	2.91517	4.84827	0.00545307	0.216948	-1.69964
MSTRG.32754.40	1.37156	0.936456	4.83273	0.0055243	0.216948	-1.71322
MSTRG.54962.11	1.64567	1.78969	4.71121	0.00612061	0.224517	-1.82062
MSTRG.152585.18	1.0692	1.40614	4.54193	0.00708242	0.237069	-1.97412
AP003117.1	1.03442	1.73153	4.50573	0.0073105	0.238123	-2.00754
MSTRG.44322.5	1.18429	1.06428	4.4363	0.00777255	0.243098	-2.07223
AC005632.3	1.17675	2.49868	4.39954	0.008031	0.245627	-2.10679
MSTRG.80089.18	1.24977	0.675024	4.25137	0.00918016	0.252038	-2.24838
MSTRG.73349.77	1.27405	0.668824	4.12897	0.0102764	0.261981	-2.36811
AC060766.7	1.00522	1.81991	3.96907	0.0119467	0.276818	-2.52833
AP001189.1	-1.66673	1.98879	-3.89815	0.0127873	0.282691	-2.60078
MSTRG.171412.15	1.1926	0.925684	3.83795	0.0135552	0.28669	-2.66297
MSTRG.141863.13	1.78865	0.894324	3.77701	0.0143875	0.290982	-2.72655
AC040904.1	1.02311	1.95673	3.75333	0.0147269	0.294173	-2.75143
MSTRG.21818.2	1.01405	0.662059	3.7301	0.0150687	0.296382	-2.77593
MSTRG.59808.30	-1.05896	11.3484	-3.58084	0.0174977	0.311323	-2.93558
MSTRG.128821.21	-1.16539	4.61142	-3.57385	0.017622	0.311998	-2.94314
HCP5	1.47421	1.96735	3.56519	0.0177776	0.312596	-2.95254
MSTRG.2619.14	1.04838	0.788497	3.54014	0.0182363	0.315081	-2.97977
MSTRG.89042.1	1.00857	1.59477	3.51577	0.018696	0.315159	-3.00637
MSTRG.180931.1	1.40654	1.62425	3.48324	0.0193302	0.31731	-3.04203
MSTRG.63281.25	1.40167	1.04819	3.48203	0.0193543	0.31739	-3.04337
MSTRG.73878.11	1.07058	1.65559	3.39129	0.0212612	0.32808	-3.14382
MSTRG.17033.11	1.63382	1.29903	3.37687	0.0215838	0.329607	-3.15991
AP003068.2	-1.15571	1.34005	-3.37542	0.0216165	0.329607	-3.16154
MSTRG.121530.2	-3.15864	2.73268	-3.28986	0.0236528	0.338325	-3.25775
AC130456.3	-1.88979	2.25692	-3.25743	0.0244813	0.342282	-3.29454
MSTRG.121534.12	2.32344	5.70896	3.21744	0.0255491	0.34844	-3.34015
MSTRG.128902.46	-1.27737	0.98314	-3.21608	0.0255863	0.34844	-3.34171
MSTRG.51216.35	1.49121	0.966541	3.134	0.0279522	0.359353	-3.43614
MSTRG.97603.12	1.41515	1.34418	3.10675	0.0287923	0.362998	-3.46775
MSTRG.92442.53	1.12887	0.564437	3.07573	0.0297832	0.367402	-3.50385
MSTRG.138950.24	2.13307	2.61241	3.026	0.0314541	0.376273	-3.56205
MSTRG.61398.12	1.05053	1.05377	3.01017	0.0320081	0.376273	-3.58067
MSTRG.14836.10	1.10788	0.943917	2.97616	0.0332358	0.381014	-3.62077
AC015871.3	1.06897	3.8104	2.9695	0.0334824	0.381182	-3.62864
MSTRG.27875.9	1.3166	0.920235	2.89465	0.0364009	0.392118	-3.71759
AC007728.3	1.20533	2.82357	2.85741	0.037959	0.39854	-3.76215
MSTRG.67057.27	1.10093	0.964523	2.8259	0.0393358	0.40341	-3.8
U62317.3	1.74481	2.33476	2.77993	0.0414467	0.411305	-3.85548
MSTRG.128821.18	-2.71836	3.5554	-2.73713	0.0435264	0.416495	-3.90738
MSTRG.116354.14	1.79003	1.50414	2.72522	0.0441254	0.418378	-3.92186
MSTRG.202831.2	-6.65407	4.92589	-2.68768	0.0460753	0.424563	-3.96764

## Sheet: supplementary table3
miRNA	target	Type	log2FC
hsa-miR-1277-5p	MSTRG.171412.15	lncRNA	1.1926
hsa-miR-1277-5p	MSTRG.57685.9	lncRNA	1.16738
hsa-miR-1277-5p	MSTRG.116354.14	lncRNA	1.79003
hsa-miR-1277-5p	MSTRG.195736.5	lncRNA	1.14038
hsa-miR-1277-5p	AC005632.3	lncRNA	1.17675
hsa-miR-1277-5p	AP000240.1	lncRNA	1.26857
hsa-miR-1277-5p	AC009032.1	lncRNA	1.06998
hsa-miR-1277-5p	AP001033.2	lncRNA	1.17389
hsa-miR-1277-5p	U62317.3	lncRNA	1.74481
hsa-miR-1277-5p	AL157394.1	lncRNA	1.11091
hsa-miR-1277-5p	AC068790.2	lncRNA	1.05433
hsa-miR-1277-5p	AC015871.3	lncRNA	1.06897
hsa-miR-1277-5p	AP003117.1	lncRNA	1.03442
hsa-miR-1277-5p	AC110792.3	lncRNA	1.2062
hsa-miR-1285-3p	MSTRG.219890.11	lncRNA	1.60264
hsa-miR-1285-3p	MSTRG.179113.8	lncRNA	1.01054
hsa-miR-1285-3p	MSTRG.14836.10	lncRNA	1.10788
hsa-miR-1285-3p	MSTRG.92440.1	lncRNA	1.02255
hsa-miR-1285-3p	MSTRG.67057.27	lncRNA	1.10093
hsa-miR-1285-3p	MSTRG.78348.30	lncRNA	1.10809
hsa-miR-1285-3p	MSTRG.92442.53	lncRNA	1.12887
hsa-miR-1285-3p	MSTRG.89042.1	lncRNA	1.00857
hsa-miR-1285-3p	MSTRG.21818.2	lncRNA	1.01405
hsa-miR-1285-3p	MSTRG.152585.18	lncRNA	1.0692
hsa-miR-1285-3p	MSTRG.116354.14	lncRNA	1.79003
hsa-miR-1285-3p	MSTRG.101397.9	lncRNA	1.09064
hsa-miR-1285-3p	MSTRG.39853.13	lncRNA	1.46359
hsa-miR-1285-3p	MSTRG.69521.33	lncRNA	1.9885
hsa-miR-1285-3p	MSTRG.27875.9	lncRNA	1.3166
hsa-miR-1285-3p	MSTRG.201110.36	lncRNA	2.27065
hsa-miR-1285-3p	AC007336.1	lncRNA	1.10856
hsa-miR-1285-3p	AC005632.3	lncRNA	1.17675
hsa-miR-1285-3p	AP000240.1	lncRNA	1.26857
hsa-miR-1285-3p	AC009032.1	lncRNA	1.06998
hsa-miR-1285-3p	AP001033.2	lncRNA	1.17389
hsa-miR-1285-3p	U62317.3	lncRNA	1.74481
hsa-miR-1285-3p	AL157394.1	lncRNA	1.11091
hsa-miR-1285-3p	AC040904.1	lncRNA	1.02311
hsa-miR-1285-3p	AC068790.2	lncRNA	1.05433
hsa-miR-1285-3p	AC007728.3	lncRNA	1.20533
hsa-miR-1285-3p	AC015871.3	lncRNA	1.06897
hsa-miR-1285-3p	AP003117.1	lncRNA	1.03442
hsa-miR-1285-3p	AC060766.7	lncRNA	1.00522
hsa-miR-1285-3p	AC103691.1	lncRNA	1.17582
hsa-miR-1285-3p	AC110792.3	lncRNA	1.2062
hsa-miR-548h-3p	AC005632.3	lncRNA	1.17675
hsa-miR-548h-3p	AP000240.1	lncRNA	1.26857
hsa-miR-1273h-5p	MSTRG.179113.8	lncRNA	1.01054
hsa-miR-1273h-5p	AC005632.3	lncRNA	1.17675
hsa-miR-1273h-5p	AP000240.1	lncRNA	1.26857
hsa-miR-1273h-5p	AC040904.1	lncRNA	1.02311
hsa-miR-1273h-5p	AC015871.3	lncRNA	1.06897
hsa-miR-1304-3p	MSTRG.141863.13	lncRNA	1.78865
hsa-miR-1304-3p	MSTRG.201110.36	lncRNA	2.27065
hsa-miR-1304-3p	AC005632.3	lncRNA	1.17675
hsa-miR-1304-3p	AC009032.1	lncRNA	1.06998
hsa-miR-1304-3p	AP001033.2	lncRNA	1.17389
hsa-miR-1304-3p	U62317.3	lncRNA	1.74481
hsa-miR-1304-3p	AL157394.1	lncRNA	1.11091
hsa-miR-1304-3p	AC040904.1	lncRNA	1.02311
hsa-miR-1304-3p	AC068790.2	lncRNA	1.05433
hsa-miR-1304-3p	AC007728.3	lncRNA	1.20533
hsa-miR-1304-3p	AP003117.1	lncRNA	1.03442
hsa-miR-1304-3p	AC060766.7	lncRNA	1.00522
hsa-miR-1304-3p	AC110792.3	lncRNA	1.2062
hsa-miR-1183	AC007728.3	lncRNA	1.20533
hsa-miR-1304-5p	AC005632.3	lncRNA	1.17675
hsa-miR-1304-5p	AP001033.2	lncRNA	1.17389
hsa-miR-1304-5p	U62317.3	lncRNA	1.74481
hsa-miR-1304-5p	AL157394.1	lncRNA	1.11091
hsa-miR-1304-5p	AC040904.1	lncRNA	1.02311
hsa-miR-1304-5p	AC060766.7	lncRNA	1.00522
hsa-miR-1304-5p	AC110792.3	lncRNA	1.2062
hsa-miR-6807-3p	MSTRG.179113.8	lncRNA	1.01054
hsa-miR-6807-3p	MSTRG.201110.36	lncRNA	2.27065
hsa-miR-6807-3p	AC005632.3	lncRNA	1.17675
hsa-miR-6807-3p	AP001033.2	lncRNA	1.17389
hsa-miR-6807-3p	AC040904.1	lncRNA	1.02311
hsa-miR-6807-3p	AC015871.3	lncRNA	1.06897
hsa-miR-548ay-3p	AP000240.1	lncRNA	1.26857
hsa-miR-619-5p	MSTRG.14761.16	lncRNA	1.14536
hsa-miR-619-5p	MSTRG.87985.20	lncRNA	1.11671
hsa-miR-619-5p	MSTRG.171412.15	lncRNA	1.1926
hsa-miR-619-5p	MSTRG.70823.3	lncRNA	1.02484
hsa-miR-619-5p	MSTRG.14836.10	lncRNA	1.10788
hsa-miR-619-5p	MSTRG.180931.1	lncRNA	1.40654
hsa-miR-619-5p	MSTRG.67057.27	lncRNA	1.10093
hsa-miR-619-5p	MSTRG.78348.30	lncRNA	1.10809
hsa-miR-619-5p	MSTRG.57685.9	lncRNA	1.16738
hsa-miR-619-5p	MSTRG.46378.31	lncRNA	1.01549
hsa-miR-619-5p	MSTRG.141863.13	lncRNA	1.78865
hsa-miR-619-5p	MSTRG.44322.5	lncRNA	1.18429
hsa-miR-619-5p	MSTRG.138950.24	lncRNA	2.13307
hsa-miR-619-5p	MSTRG.92442.53	lncRNA	1.12887
hsa-miR-619-5p	MSTRG.89042.1	lncRNA	1.00857
hsa-miR-619-5p	MSTRG.66918.11	lncRNA	1.71544
hsa-miR-619-5p	MSTRG.61398.12	lncRNA	1.05053
hsa-miR-619-5p	MSTRG.80089.18	lncRNA	1.24977
hsa-miR-619-5p	MSTRG.21818.2	lncRNA	1.01405
hsa-miR-619-5p	MSTRG.152585.18	lncRNA	1.0692
hsa-miR-619-5p	MSTRG.101397.9	lncRNA	1.09064
hsa-miR-619-5p	MSTRG.204683.20	lncRNA	1.37879
hsa-miR-619-5p	MSTRG.188541.29	lncRNA	1.05136
hsa-miR-619-5p	MSTRG.39853.13	lncRNA	1.46359
hsa-miR-619-5p	MSTRG.151055.39	lncRNA	2.05663
hsa-miR-619-5p	MSTRG.54962.12	lncRNA	1.92579
hsa-miR-619-5p	MSTRG.69521.33	lncRNA	1.9885
hsa-miR-619-5p	MSTRG.27875.9	lncRNA	1.3166
hsa-miR-619-5p	MSTRG.201110.36	lncRNA	2.27065
hsa-miR-619-5p	MSTRG.38840.33	lncRNA	1.40646
hsa-miR-619-5p	MSTRG.126066.49	lncRNA	1.56253
hsa-miR-619-5p	MSTRG.51216.35	lncRNA	1.49121
hsa-miR-619-5p	AC007336.1	lncRNA	1.10856
hsa-miR-619-5p	AC005632.3	lncRNA	1.17675
hsa-miR-619-5p	AP000240.1	lncRNA	1.26857
hsa-miR-619-5p	AC009032.1	lncRNA	1.06998
hsa-miR-619-5p	AP001033.2	lncRNA	1.17389
hsa-miR-619-5p	U62317.3	lncRNA	1.74481
hsa-miR-619-5p	AL157394.1	lncRNA	1.11091
hsa-miR-619-5p	AC040904.1	lncRNA	1.02311
hsa-miR-619-5p	AC068790.2	lncRNA	1.05433
hsa-miR-619-5p	AC007728.3	lncRNA	1.20533
hsa-miR-619-5p	AC015871.3	lncRNA	1.06897
hsa-miR-619-5p	AP003117.1	lncRNA	1.03442
hsa-miR-619-5p	AC060766.7	lncRNA	1.00522
hsa-miR-619-5p	AC103691.1	lncRNA	1.17582
hsa-miR-619-5p	AC110792.3	lncRNA	1.2062
hsa-miR-5689	MSTRG.67057.27	lncRNA	1.10093
hsa-miR-5689	MSTRG.73349.77	lncRNA	1.27405
hsa-miR-5689	AC005632.3	lncRNA	1.17675
hsa-miR-5689	AP001033.2	lncRNA	1.17389
hsa-miR-5689	U62317.3	lncRNA	1.74481
hsa-miR-5689	AC007728.3	lncRNA	1.20533
hsa-miR-5689	AC015871.3	lncRNA	1.06897
hsa-miR-5689	AC110792.3	lncRNA	1.2062
hsa-miR-548z	AC005632.3	lncRNA	1.17675
hsa-miR-548z	AP000240.1	lncRNA	1.26857
hsa-miR-6873-3p	MSTRG.21818.2	lncRNA	1.01405
hsa-miR-6873-3p	AC007336.1	lncRNA	1.10856
hsa-miR-6873-3p	AC005632.3	lncRNA	1.17675
hsa-miR-6873-3p	AP000240.1	lncRNA	1.26857
hsa-miR-6873-3p	AP001033.2	lncRNA	1.17389
hsa-miR-6873-3p	U62317.3	lncRNA	1.74481
hsa-miR-6873-3p	AL157394.1	lncRNA	1.11091
hsa-miR-6873-3p	AC068790.2	lncRNA	1.05433
hsa-miR-6873-3p	AC007728.3	lncRNA	1.20533
hsa-miR-6873-3p	AP003117.1	lncRNA	1.03442
hsa-miR-6873-3p	AC060766.7	lncRNA	1.00522
hsa-miR-6873-3p	AC103691.1	lncRNA	1.17582
hsa-miR-6873-3p	AC110792.3	lncRNA	1.2062
hsa-miR-6796-5p	AC007728.3	lncRNA	1.20533
hsa-miR-8485	MSTRG.219890.11	lncRNA	1.60264
hsa-miR-8485	MSTRG.171412.15	lncRNA	1.1926
hsa-miR-8485	MSTRG.141863.13	lncRNA	1.78865
hsa-miR-8485	MSTRG.54962.11	lncRNA	1.64567
hsa-miR-8485	MSTRG.44322.5	lncRNA	1.18429
hsa-miR-8485	MSTRG.138950.24	lncRNA	2.13307
hsa-miR-8485	MSTRG.17033.11	lncRNA	1.63382
hsa-miR-8485	MSTRG.152585.18	lncRNA	1.0692
hsa-miR-8485	MSTRG.101397.9	lncRNA	1.09064
hsa-miR-8485	MSTRG.54962.12	lncRNA	1.92579
hsa-miR-8485	AC007336.1	lncRNA	1.10856
hsa-miR-8485	AC005632.3	lncRNA	1.17675
hsa-miR-8485	AP000240.1	lncRNA	1.26857
hsa-miR-8485	AC009032.1	lncRNA	1.06998
hsa-miR-8485	AL157394.1	lncRNA	1.11091
hsa-miR-8485	AC007728.3	lncRNA	1.20533
hsa-miR-8485	AC015871.3	lncRNA	1.06897
hsa-miR-8485	AP003117.1	lncRNA	1.03442
hsa-miR-8485	AC060766.7	lncRNA	1.00522
hsa-miR-8485	AC110792.3	lncRNA	1.2062
hsa-miR-8485	MSTRG.11138.13	lncRNA	-1.73573
hsa-miR-8485	AP001189.1	lncRNA	-1.66673
hsa-miR-8485	AC023830.3	lncRNA	-1.00749
hsa-miR-8485	AP003068.2	lncRNA	-1.15571
hsa-miR-8485	AC130456.3	lncRNA	-1.88979
hsa-miR-6797-5p	MSTRG.63281.25	lncRNA	1.40167
hsa-miR-6797-5p	AC005632.3	lncRNA	1.17675
hsa-miR-1277-5p	MSTRG.82397.25	lncRNA	-1.53259
hsa-miR-1277-5p	AP001189.1	lncRNA	-1.66673
hsa-miR-1277-5p	AC130456.3	lncRNA	-1.88979
hsa-miR-6751-5p	AC110792.3	lncRNA	1.2062
hsa-miR-1228-3p	U62317.3	lncRNA	1.74481
hsa-miR-6882-3p	U62317.3	lncRNA	1.74481
hsa-miR-6882-3p	AC103691.1	lncRNA	1.17582
hsa-miR-2276-5p	AP003068.2	lncRNA	-1.15571
hsa-miR-2053	AL157394.1	lncRNA	1.11091
hsa-miR-4452	MSTRG.204683.20	lncRNA	1.37879
hsa-miR-4452	MSTRG.151055.39	lncRNA	2.05663
hsa-miR-4452	AC005632.3	lncRNA	1.17675
hsa-miR-4452	AC009032.1	lncRNA	1.06998
hsa-miR-4452	AP001033.2	lncRNA	1.17389
hsa-miR-4452	U62317.3	lncRNA	1.74481
hsa-miR-4452	AC040904.1	lncRNA	1.02311
hsa-miR-4452	AC068790.2	lncRNA	1.05433
hsa-miR-4452	AC007728.3	lncRNA	1.20533
hsa-miR-4452	AP003117.1	lncRNA	1.03442
hsa-miR-6507-3p	AP000240.1	lncRNA	1.26857
hsa-miR-4644	MSTRG.138950.24	lncRNA	2.13307
hsa-miR-4644	AL157394.1	lncRNA	1.11091
hsa-miR-4644	AC068790.2	lncRNA	1.05433
hsa-miR-6867-5p	AC103691.1	lncRNA	1.17582
hsa-miR-6510-5p	MSTRG.201110.36	lncRNA	2.27065
hsa-miR-6510-5p	AC110792.3	lncRNA	1.2062
hsa-miR-7851-3p	MSTRG.219890.11	lncRNA	1.60264
hsa-miR-7851-3p	MSTRG.2619.14	lncRNA	1.04838
hsa-miR-7851-3p	MSTRG.14836.10	lncRNA	1.10788
hsa-miR-7851-3p	MSTRG.67057.27	lncRNA	1.10093
hsa-miR-7851-3p	MSTRG.78348.30	lncRNA	1.10809
hsa-miR-7851-3p	MSTRG.39853.13	lncRNA	1.46359
hsa-miR-7851-3p	AC005632.3	lncRNA	1.17675
hsa-miR-7851-3p	AP000240.1	lncRNA	1.26857
hsa-miR-7851-3p	AP001033.2	lncRNA	1.17389
hsa-miR-7851-3p	U62317.3	lncRNA	1.74481
hsa-miR-7851-3p	AL157394.1	lncRNA	1.11091
hsa-miR-7851-3p	AC068790.2	lncRNA	1.05433
hsa-miR-7851-3p	AC007728.3	lncRNA	1.20533
hsa-miR-7851-3p	AC015871.3	lncRNA	1.06897
hsa-miR-7851-3p	AP003117.1	lncRNA	1.03442
hsa-miR-7851-3p	AC060766.7	lncRNA	1.00522
hsa-miR-7851-3p	AC103691.1	lncRNA	1.17582
hsa-miR-7851-3p	AC110792.3	lncRNA	1.2062
hsa-miR-4739	MSTRG.66918.11	lncRNA	1.71544
hsa-miR-4739	AC110792.3	lncRNA	1.2062
hsa-miR-1236-3p	U62317.3	lncRNA	1.74481
hsa-miR-1236-3p	AC068790.2	lncRNA	1.05433
hsa-miR-4517	AC007728.3	lncRNA	1.20533
hsa-miR-6756-5p	AC005632.3	lncRNA	1.17675
hsa-miR-6756-5p	AC009032.1	lncRNA	1.06998
hsa-miR-6756-5p	U62317.3	lncRNA	1.74481
hsa-miR-6756-5p	AC068790.2	lncRNA	1.05433
hsa-miR-3613-3p	AC007336.1	lncRNA	1.10856
hsa-miR-1303	MSTRG.44322.5	lncRNA	1.18429
hsa-miR-1303	MSTRG.21818.2	lncRNA	1.01405
hsa-miR-1303	AC005632.3	lncRNA	1.17675
hsa-miR-1303	AP001033.2	lncRNA	1.17389
hsa-miR-1303	AL157394.1	lncRNA	1.11091
hsa-miR-1303	AC068790.2	lncRNA	1.05433
hsa-miR-1303	AC007728.3	lncRNA	1.20533
hsa-miR-1303	AP003117.1	lncRNA	1.03442
hsa-miR-1303	AC060766.7	lncRNA	1.00522
hsa-miR-1303	AC103691.1	lncRNA	1.17582
hsa-miR-6803-5p	AC130456.3	lncRNA	-1.88979
hsa-miR-6803-5p	U62317.3	lncRNA	1.74481
hsa-miR-6803-5p	AL157394.1	lncRNA	1.11091
hsa-miR-10400-5p	MSTRG.121530.2	lncRNA	-3.15864
hsa-miR-10400-5p	MSTRG.201110.36	lncRNA	2.27065
hsa-miR-4763-3p	AC023830.3	lncRNA	-1.00749
hsa-miR-4763-3p	AP003068.2	lncRNA	-1.15571
hsa-miR-6089	MSTRG.219890.11	lncRNA	1.60264
hsa-miR-6089	MSTRG.27875.9	lncRNA	1.3166
hsa-miR-6089	AC005632.3	lncRNA	1.17675
hsa-miR-6089	AC009032.1	lncRNA	1.06998
hsa-miR-6089	AP001033.2	lncRNA	1.17389
hsa-miR-6089	U62317.3	lncRNA	1.74481
hsa-miR-6089	AC068790.2	lncRNA	1.05433
hsa-miR-6089	AC007728.3	lncRNA	1.20533
hsa-miR-6089	AC015871.3	lncRNA	1.06897
hsa-miR-3145-3p	MSTRG.21818.2	lncRNA	1.01405
hsa-miR-6769b-5p	AL157394.1	lncRNA	1.11091
hsa-miR-519d-5p	AC060766.7	lncRNA	1.00522
hsa-miR-7107-3p	MSTRG.141863.13	lncRNA	1.78865
hsa-miR-7107-3p	AL157394.1	lncRNA	1.11091
hsa-miR-7107-3p	AC015871.3	lncRNA	1.06897
hsa-miR-7107-3p	AC110792.3	lncRNA	1.2062
hsa-miR-574-5p	AC007336.1	lncRNA	1.10856
hsa-miR-574-5p	U62317.3	lncRNA	1.74481
hsa-miR-574-5p	AL157394.1	lncRNA	1.11091
hsa-miR-574-5p	AC068790.2	lncRNA	1.05433
hsa-miR-3159	MSTRG.14836.10	lncRNA	1.10788
hsa-miR-3159	MSTRG.44322.5	lncRNA	1.18429
hsa-miR-3159	AC005632.3	lncRNA	1.17675
hsa-miR-3159	AP001033.2	lncRNA	1.17389
hsa-miR-3159	AL157394.1	lncRNA	1.11091
hsa-miR-3159	AC068790.2	lncRNA	1.05433
hsa-miR-3159	AC110792.3	lncRNA	1.2062
hsa-miR-1277-5p	Homo_sapiens_newGene_38678	mRNA	1.44081
hsa-miR-1277-5p	Homo_sapiens_newGene_56282	mRNA	1.43503
hsa-miR-1277-5p	Homo_sapiens_newGene_56516	mRNA	1.30217
hsa-miR-1285-3p	Homo_sapiens_newGene_37307	mRNA	1.49346
hsa-miR-1285-3p	Homo_sapiens_newGene_99714	mRNA	1.18627
hsa-miR-1285-3p	Homo_sapiens_newGene_56282	mRNA	1.43503
hsa-miR-1285-3p	Homo_sapiens_newGene_56516	mRNA	1.30217
hsa-miR-548h-3p	Homo_sapiens_newGene_99714	mRNA	1.18627
hsa-miR-1273h-5p	Homo_sapiens_newGene_37307	mRNA	1.49346
hsa-miR-1304-3p	Homo_sapiens_newGene_38678	mRNA	1.44081
hsa-miR-1183	Homo_sapiens_newGene_56282	mRNA	1.43503
hsa-miR-1304-5p	Homo_sapiens_newGene_37307	mRNA	1.49346
hsa-miR-6807-3p	Homo_sapiens_newGene_99714	mRNA	1.18627
hsa-miR-6807-3p	Homo_sapiens_newGene_56282	mRNA	1.43503
hsa-miR-548ay-3p	Homo_sapiens_newGene_99714	mRNA	1.18627
hsa-miR-619-5p	Homo_sapiens_newGene_99714	mRNA	1.18627
hsa-miR-619-5p	Homo_sapiens_newGene_38678	mRNA	1.44081
hsa-miR-619-5p	Homo_sapiens_newGene_56282	mRNA	1.43503
hsa-miR-619-5p	Homo_sapiens_newGene_56516	mRNA	1.30217
hsa-miR-5689	Homo_sapiens_newGene_38678	mRNA	1.44081
hsa-miR-548z	Homo_sapiens_newGene_99714	mRNA	1.18627
hsa-miR-6873-3p	Homo_sapiens_newGene_56282	mRNA	1.43503
hsa-miR-6873-3p	Homo_sapiens_newGene_56516	mRNA	1.30217
hsa-miR-6796-5p	IL5RA	mRNA	1.35345
hsa-miR-8485	DPYD	mRNA	1.00527
hsa-miR-8485	TMOD2	mRNA	1.09617
hsa-miR-8485	CPNE8	mRNA	1.18352
hsa-miR-8485	CLEC12A	mRNA	1.36728
hsa-miR-8485	MYLK	mRNA	-1.20461
hsa-miR-8485	EVI2A	mRNA	1.52598
hsa-miR-8485	FBXO11	mRNA	1.03573
hsa-miR-8485	SMCHD1	mRNA	1.06376
hsa-miR-8485	JAK2	mRNA	1.28838
hsa-miR-6797-5p	CPNE8	mRNA	1.18352
hsa-miR-6797-5p	CLEC4E	mRNA	1.17382
hsa-miR-1277-5p	PDP1	mRNA	1.13068
hsa-miR-1277-5p	TIMM10	mRNA	1.08601
hsa-miR-1277-5p	QKI	mRNA	1.00738
hsa-miR-1277-5p	ZNF429	mRNA	1.02442
hsa-miR-1277-5p	CAVIN2	mRNA	-1.15306
hsa-miR-1277-5p	USP15	mRNA	1.11489
hsa-miR-1277-5p	PRRG4	mRNA	1.00399
hsa-miR-1277-5p	FMN1	mRNA	1.26101
hsa-miR-1277-5p	SCPEP1	mRNA	1.1304
hsa-miR-6751-5p	FMN1	mRNA	1.26101
hsa-miR-1228-3p	VCAN	mRNA	1.39698
hsa-miR-1285-3p	STARD4	mRNA	1.03216
hsa-miR-1285-3p	MILR1	mRNA	1.2945
hsa-miR-1285-3p	TMX1	mRNA	1.0955
hsa-miR-1285-3p	PARP14	mRNA	1.3692
hsa-miR-1285-3p	USP8	mRNA	1.08781
hsa-miR-1285-3p	SNAPC3	mRNA	1.0985
hsa-miR-6882-3p	MCTP1	mRNA	1.09098
hsa-miR-2276-5p	OBSCN	mRNA	-1.03353
hsa-miR-1273h-5p	MXRA7	mRNA	1.0779
hsa-miR-2053	HNRNPLL	mRNA	1.20042
hsa-miR-4452	QKI	mRNA	1.00738
hsa-miR-1304-3p	USP8	mRNA	1.08781
hsa-miR-1304-3p	HBS1L	mRNA	1.02579
hsa-miR-1183	FMN1	mRNA	1.26101
hsa-miR-6507-3p	DDX60	mRNA	1.48149
hsa-miR-4644	CCDC88A	mRNA	1.03644
hsa-miR-6867-5p	DDX58	mRNA	1.32528
hsa-miR-6510-5p	TLR6	mRNA	1.03745
hsa-miR-7851-3p	PRRG4	mRNA	1.00399
hsa-miR-7851-3p	USP8	mRNA	1.08781
hsa-miR-7851-3p	ZNF117	mRNA	1.46934
hsa-miR-7851-3p	PARP14	mRNA	1.3692
hsa-miR-4739	KCNE1	mRNA	1.10082
hsa-miR-4739	OAS1	mRNA	1.61014
hsa-miR-4739	AGFG1	mRNA	1.01928
hsa-miR-4739	MCTP1	mRNA	1.09098
hsa-miR-1236-3p	TUT7	mRNA	1.00094
hsa-miR-4517	LSM8	mRNA	1.13334
hsa-miR-6756-5p	HNRNPLL	mRNA	1.20042
hsa-miR-6756-5p	FMN1	mRNA	1.26101
hsa-miR-6807-3p	USP8	mRNA	1.08781
hsa-miR-3613-3p	ITGA4	mRNA	1.2031
hsa-miR-1303	USP8	mRNA	1.08781
hsa-miR-1303	TMEM144	mRNA	1.22155
hsa-miR-1303	AGFG1	mRNA	1.01928
hsa-miR-6803-5p	ESPN	mRNA	-1.25896
hsa-miR-6803-5p	FMN1	mRNA	1.26101
hsa-miR-10400-5p	TMEM158	mRNA	-1.70563
hsa-miR-10400-5p	FBXO11	mRNA	1.03573
hsa-miR-4763-3p	MYL4	mRNA	-1.54442
hsa-miR-4763-3p	OBSCN	mRNA	-1.03353
hsa-miR-6089	SLC25A24	mRNA	1.17107
hsa-miR-3145-3p	QKI	mRNA	1.00738
hsa-miR-6769b-5p	C9orf72	mRNA	1.29653
hsa-miR-519d-5p	KDM7A	mRNA	1.13471
hsa-miR-7107-3p	CD86	mRNA	1.13977
hsa-miR-619-5p	CAPZA2	mRNA	1.06562
hsa-miR-619-5p	FGL2	mRNA	1.50388
hsa-miR-619-5p	TMOD2	mRNA	1.09617
hsa-miR-619-5p	ZBP1	mRNA	1.19499
hsa-miR-619-5p	S1PR3	mRNA	1.21805
hsa-miR-619-5p	AHR	mRNA	1.16899
hsa-miR-619-5p	ZNF429	mRNA	1.02442
hsa-miR-619-5p	USP15	mRNA	1.11489
hsa-miR-619-5p	PRRG4	mRNA	1.00399
hsa-miR-619-5p	USP8	mRNA	1.08781
hsa-miR-619-5p	OAS1	mRNA	1.61014
hsa-miR-619-5p	LACTB	mRNA	1.07376
hsa-miR-619-5p	SNAPC3	mRNA	1.0985
hsa-miR-619-5p	FMN1	mRNA	1.26101
hsa-miR-619-5p	MXRA7	mRNA	1.0779
hsa-miR-619-5p	CHURC1	mRNA	1.25369
hsa-miR-6873-3p	DPYD	mRNA	1.00527
hsa-miR-6873-3p	TMCO1	mRNA	1.00083
hsa-miR-6873-3p	CD86	mRNA	1.13977
hsa-miR-6873-3p	CLEC4E	mRNA	1.17382
hsa-miR-6873-3p	IL5RA	mRNA	1.35345
hsa-miR-574-5p	SAMD9L	mRNA	1.69332
hsa-miR-3159	ST3GAL6	mRNA	1.1362
hsa-miR-197-3p	MSTRG.51216.35	lncRNA	1.49121
hsa-miR-4449	Homo_sapiens_newGene_11973	mRNA	-1.65165
hsa-miR-10401-3p	Homo_sapiens_newGene_11973	mRNA	-1.65165
hsa-miR-663b	Homo_sapiens_newGene_11973	mRNA	-1.65165
hsa-miR-10396a-5p	Homo_sapiens_newGene_11973	mRNA	-1.65165
hsa-miR-10396b-3p	Homo_sapiens_newGene_11973	mRNA	-1.65165
hsa-miR-6793-5p	Homo_sapiens_newGene_11973	mRNA	-1.65165
hsa-miR-10396b-5p	Homo_sapiens_newGene_11973	mRNA	-1.65165
hsa-miR-4466	Homo_sapiens_newGene_11973	mRNA	-1.65165
hsa-miR-10401-5p	Homo_sapiens_newGene_11973	mRNA	-1.65165
hsa-miR-10396a-3p	Homo_sapiens_newGene_11973	mRNA	-1.65165
hsa-miR-504-3p	Homo_sapiens_newGene_56282	mRNA	1.43503
hsa-miR-504-3p	Homo_sapiens_newGene_56516	mRNA	1.30217
hsa-miR-3648	Homo_sapiens_newGene_11973	mRNA	-1.65165
hsa-miR-3180-5p	Homo_sapiens_newGene_99714	mRNA	1.18627
hsa-miR-663a	Homo_sapiens_newGene_11973	mRNA	-1.65165
hsa-miR-4533	Homo_sapiens_newGene_11973	mRNA	-1.65165
hsa-miR-143-5p	Homo_sapiens_newGene_38678	mRNA	1.44081
hsa-miR-6786-5p	Homo_sapiens_newGene_11973	mRNA	-1.65165
hsa-miR-4767	Homo_sapiens_newGene_11973	mRNA	-1.65165
hsa-miR-515-5p	ZNF117	mRNA	1.46934
hsa-miR-6829-3p	TUBB1	mRNA	-1.02465
hsa-miR-329-5p	TNFSF10	mRNA	1.15383
hsa-miR-4449	OBSCN	mRNA	-1.03353
hsa-miR-6763-3p	OBSCN	mRNA	-1.03353
hsa-miR-3119	ETV7	mRNA	1.42039
hsa-miR-635	OBSCN	mRNA	-1.03353
hsa-miR-4539	OBSCN	mRNA	-1.03353
hsa-miR-3613-5p	GLIPR1	mRNA	1.04862
hsa-miR-302a-3p	SMCHD1	mRNA	1.06376
hsa-miR-3960	TMEM158	mRNA	-1.70563
hsa-miR-3960	FBXO11	mRNA	1.03573
hsa-miR-3960	RB1	mRNA	1.04173
hsa-miR-3960	MCTP1	mRNA	1.09098
hsa-miR-1915-5p	FMN1	mRNA	1.26101
hsa-miR-224-5p	ITGA4	mRNA	1.2031
hsa-miR-6511b-5p	OBSCN	mRNA	-1.03353
hsa-miR-4755-5p	IFIH1	mRNA	1.31308
hsa-miR-6516-5p	LSM8	mRNA	1.13334
hsa-miR-4726-5p	ESPN	mRNA	-1.25896
hsa-miR-597-3p	CTDSPL	mRNA	-1.03265
hsa-miR-324-3p	CBWD3	mRNA	1.29104
hsa-miR-324-3p	CBWD6	mRNA	1.39904
hsa-miR-6811-5p	ITGA4	mRNA	1.2031
hsa-miR-4701-5p	SLC38A5	mRNA	-1.54506
hsa-miR-1538	OBSCN	mRNA	-1.03353
hsa-miR-4646-5p	CLEC4E	mRNA	1.17382
hsa-miR-4662a-5p	USP15	mRNA	1.11489
hsa-miR-1292-3p	CTDSPL	mRNA	-1.03265
hsa-miR-6783-5p	OXR1	mRNA	1.04746
hsa-miR-6722-3p	OBSCN	mRNA	-1.03353
hsa-miR-4776-5p	MAP2K4	mRNA	1.11586
hsa-miR-6747-3p	OBSCN	mRNA	-1.03353
hsa-miR-190a-5p	DMXL2	mRNA	1.62606
hsa-miR-6878-3p	OBSCN	mRNA	-1.03353
hsa-miR-6878-3p	CTTN	mRNA	-1.16667
hsa-miR-6878-3p	SLC38A5	mRNA	-1.54506
hsa-miR-5693	CCNT2	mRNA	1.13892
hsa-miR-6876-5p	WDR49	mRNA	1.07645
hsa-miR-526a-3p	CCPG1	mRNA	1.17069
hsa-miR-135a-3p	HNRNPLL	mRNA	1.20042
hsa-miR-10392-3p	PDE5A	mRNA	-1.01756
hsa-miR-10392-3p	SNAPC3	mRNA	1.0985
hsa-miR-3612	IFI16	mRNA	1.09392
hsa-miR-3670	MYOM2	mRNA	-1.97261
hsa-miR-3925-3p	ZNF66	mRNA	1.27371
hsa-miR-3925-3p	ZNF429	mRNA	1.02442
hsa-miR-3925-3p	ZNF117	mRNA	1.46934
hsa-miR-548az-5p	GLIPR1	mRNA	1.04862
hsa-miR-504-3p	USP8	mRNA	1.08781
hsa-miR-6782-5p	QKI	mRNA	1.00738
hsa-miR-6774-5p	SLC38A5	mRNA	-1.54506
hsa-miR-6849-3p	ZBP1	mRNA	1.19499
hsa-miR-3059-5p	MYLK	mRNA	-1.20461
hsa-miR-6743-5p	OAS1	mRNA	1.61014
hsa-miR-198	GUK1	mRNA	-1.11612
hsa-miR-3924	PDE5A	mRNA	-1.01756
hsa-miR-762	MCTP1	mRNA	1.09098
hsa-miR-5193	SLC38A5	mRNA	-1.54506
hsa-miR-3646	HNRNPLL	mRNA	1.20042
hsa-miR-4789-5p	PDE5A	mRNA	-1.01756
hsa-miR-12128	OBSCN	mRNA	-1.03353
hsa-miR-7111-5p	FBXO11	mRNA	1.03573
hsa-miR-485-5p	SERPING1	mRNA	1.16017
hsa-miR-6851-5p	FMN1	mRNA	1.26101
hsa-miR-3668	PARP14	mRNA	1.3692
hsa-miR-3916	TMOD2	mRNA	1.09617
hsa-miR-3916	C4orf33	mRNA	1.03719
hsa-miR-3916	AZI2	mRNA	1.21446
hsa-miR-3662	PRRG4	mRNA	1.00399
hsa-miR-3907	IL5RA	mRNA	1.35345
hsa-miR-3978	FMN1	mRNA	1.26101
hsa-miR-3978	SMCHD1	mRNA	1.06376
hsa-miR-6529-3p	HBS1L	mRNA	1.02579
hsa-miR-3925-5p	USP15	mRNA	1.11489
hsa-miR-653-3p	IFI16	mRNA	1.09392
hsa-miR-615-3p	OBSCN	mRNA	-1.03353
hsa-miR-1243	FMN1	mRNA	1.26101
hsa-miR-125a-3p	SERPING1	mRNA	1.16017
hsa-miR-7110-5p	MYLK	mRNA	-1.20461
hsa-miR-3127-3p	OBSCN	mRNA	-1.03353
hsa-miR-6843-3p	STAT1	mRNA	1.26648
hsa-miR-7845-5p	OBSCN	mRNA	-1.03353
hsa-miR-2054	PDE5A	mRNA	-1.01756
hsa-miR-877-3p	SLC38A5	mRNA	-1.54506

## Sheet: supplementary table4
#node1	node2	node1_string_id	node2_string_id	neighborhood_on_chromosome	gene_fusion	phylogenetic_cooccurrence	homology	coexpression	experimentally_determined_interaction	database_annotated	automated_textmining	combined_score
AGFG1	CTTN	9606.ENSP00000387282	9606.ENSP00000365745	0	0	0	0	0	0	0.9	0.082	0.904
AGFG1	HNRNPLL	9606.ENSP00000387282	9606.ENSP00000390625	0	0	0	0	0	0	0	0.416	0.416
AHR	RB1	9606.ENSP00000242057	9606.ENSP00000267163	0	0	0	0	0	0.454	0	0.145	0.513
AHR	STAT1	9606.ENSP00000242057	9606.ENSP00000354394	0	0	0	0	0.061	0.299	0	0.704	0.788
AZI2	ZBP1	9606.ENSP00000419371	9606.ENSP00000360215	0	0	0	0	0	0	0	0.576	0.576
CCNT2	RB1	9606.ENSP00000264157	9606.ENSP00000267163	0	0	0	0	0.062	0.396	0	0.062	0.422
CCNT2	SNAPC3	9606.ENSP00000264157	9606.ENSP00000370200	0	0	0	0	0.064	0	0.9	0	0.902
CD86	TNFSF10	9606.ENSP00000332049	9606.ENSP00000241261	0	0	0	0	0.137	0	0	0.401	0.46
CD86	FGL2	9606.ENSP00000332049	9606.ENSP00000248598	0	0	0	0	0.318	0	0	0.186	0.421
CD86	IFIH1	9606.ENSP00000332049	9606.ENSP00000263642	0	0	0	0	0.119	0	0	0.424	0.471
CD86	CLEC12A	9606.ENSP00000332049	9606.ENSP00000347916	0	0	0	0	0.339	0	0	0.221	0.463
CD86	DDX58	9606.ENSP00000332049	9606.ENSP00000369213	0	0	0	0	0.061	0	0	0.473	0.483
CD86	ITGA4	9606.ENSP00000332049	9606.ENSP00000380227	0	0	0	0	0.119	0	0	0.446	0.491
CD86	STAT1	9606.ENSP00000332049	9606.ENSP00000354394	0	0	0	0	0.063	0	0	0.559	0.569
CD86	TLR6	9606.ENSP00000332049	9606.ENSP00000389600	0	0	0	0	0.116	0	0	0.675	0.701
CHURC1	TIMM10	9606.ENSP00000475473	9606.ENSP00000257245	0	0	0	0	0.142	0	0	0.431	0.491
CLEC12A	CLEC4E	9606.ENSP00000347916	9606.ENSP00000299663	0	0	0	0	0.177	0	0	0.56	0.623
CLEC4E	TLR6	9606.ENSP00000299663	9606.ENSP00000389600	0	0	0	0	0.084	0.06	0	0.543	0.572
CTTN	MYLK	9606.ENSP00000365745	9606.ENSP00000353452	0	0	0	0	0.06	0.517	0	0.708	0.856
CTTN	FMN1	9606.ENSP00000365745	9606.ENSP00000479134	0	0	0	0	0	0	0	0.561	0.561
DDX58	TNFSF10	9606.ENSP00000369213	9606.ENSP00000241261	0	0	0	0	0.231	0	0	0.311	0.447
DDX58	IFIH1	9606.ENSP00000369213	9606.ENSP00000263642	0	0	0	0.752	0.783	0	0.9	0.929	0.982
DDX58	USP15	9606.ENSP00000369213	9606.ENSP00000280377	0	0	0	0	0.086	0.379	0	0.595	0.75
DDX58	SAMD9L	9606.ENSP00000369213	9606.ENSP00000326247	0	0	0	0	0.746	0	0	0.267	0.806
DDX58	STAT1	9606.ENSP00000369213	9606.ENSP00000354394	0	0	0	0	0.602	0.379	0.9	0.717	0.992
DDX58	IFI16	9606.ENSP00000369213	9606.ENSP00000357113	0	0	0	0	0.128	0	0	0.816	0.833
DDX58	ZBP1	9606.ENSP00000369213	9606.ENSP00000360215	0	0	0	0	0.218	0	0	0.554	0.637
DDX58	PARP14	9606.ENSP00000369213	9606.ENSP00000418194	0	0	0	0	0.472	0	0	0.145	0.529
DDX58	TLR6	9606.ENSP00000369213	9606.ENSP00000389600	0	0	0	0	0.082	0	0	0.834	0.841
DDX58	DDX60	9606.ENSP00000369213	9606.ENSP00000377344	0	0	0	0	0.768	0	0	0.607	0.905
DDX58	OAS1	9606.ENSP00000369213	9606.ENSP00000388001	0	0	0	0	0.782	0	0	0.669	0.924
DDX60	IFIH1	9606.ENSP00000377344	9606.ENSP00000263642	0	0	0	0	0.797	0	0	0.607	0.917
DDX60	SAMD9L	9606.ENSP00000377344	9606.ENSP00000326247	0	0	0	0	0.817	0	0	0.247	0.856
DDX60	STAT1	9606.ENSP00000377344	9606.ENSP00000354394	0	0	0	0	0.739	0	0	0.399	0.836
DDX60	IFI16	9606.ENSP00000377344	9606.ENSP00000357113	0	0	0	0	0.177	0	0	0.42	0.502
DDX60	ZBP1	9606.ENSP00000377344	9606.ENSP00000360215	0	0	0	0	0.511	0	0	0.247	0.616
DDX60	PARP14	9606.ENSP00000377344	9606.ENSP00000418194	0.048	0	0	0	0.321	0	0	0.344	0.54
DDX60	OAS1	9606.ENSP00000377344	9606.ENSP00000388001	0	0	0	0	0.726	0	0	0.51	0.86
DMXL2	OXR1	9606.ENSP00000441858	9606.ENSP00000405424	0	0	0	0	0.081	0.063	0	0.469	0.503
DPYD	GUK1	9606.ENSP00000359211	9606.ENSP00000355689	0.06	0	0	0	0.086	0.185	0	0.281	0.429
ESPN	FMN1	9606.ENSP00000367059	9606.ENSP00000479134	0	0	0	0	0.088	0.186	0	0.358	0.481
FMN1	MYLK	9606.ENSP00000479134	9606.ENSP00000353452	0	0	0	0	0	0	0	0.409	0.409
FMN1	JAK2	9606.ENSP00000479134	9606.ENSP00000371067	0	0	0	0	0.062	0.261	0	0.228	0.418
GLIPR1	TNFSF10	9606.ENSP00000266659	9606.ENSP00000241261	0	0	0	0	0	0	0	0.454	0.454
GUK1	PDE5A	9606.ENSP00000355689	9606.ENSP00000347046	0	0	0	0	0.063	0.058	0.65	0.052	0.667
IFI16	IFIH1	9606.ENSP00000357113	9606.ENSP00000263642	0	0	0	0	0.181	0	0	0.669	0.717
IFI16	RB1	9606.ENSP00000357113	9606.ENSP00000267163	0	0	0	0	0	0.448	0	0.041	0.448
IFI16	SAMD9L	9606.ENSP00000357113	9606.ENSP00000326247	0	0	0	0	0.549	0	0	0	0.549
IFI16	STAT1	9606.ENSP00000357113	9606.ENSP00000354394	0	0	0	0	0.157	0	0	0.47	0.534
IFI16	TLR6	9606.ENSP00000357113	9606.ENSP00000389600	0	0	0	0	0.087	0	0	0.476	0.501
IFI16	OAS1	9606.ENSP00000357113	9606.ENSP00000388001	0	0	0	0	0.121	0	0	0.534	0.572
IFI16	ZBP1	9606.ENSP00000357113	9606.ENSP00000360215	0	0	0	0	0.069	0	0	0.566	0.578
IFIH1	TNFSF10	9606.ENSP00000263642	9606.ENSP00000241261	0	0	0	0	0.299	0	0	0.286	0.478
IFIH1	ZBP1	9606.ENSP00000263642	9606.ENSP00000360215	0	0	0	0	0.256	0	0	0.484	0.6
IFIH1	TLR6	9606.ENSP00000263642	9606.ENSP00000389600	0	0	0	0	0.107	0	0	0.709	0.729
IFIH1	SAMD9L	9606.ENSP00000263642	9606.ENSP00000326247	0	0	0	0	0.776	0	0	0.258	0.827
IFIH1	OAS1	9606.ENSP00000263642	9606.ENSP00000388001	0	0	0	0	0.644	0	0	0.669	0.877
IFIH1	PARP14	9606.ENSP00000263642	9606.ENSP00000418194	0	0	0	0	0.872	0	0	0.14	0.885
IFIH1	STAT1	9606.ENSP00000263642	9606.ENSP00000354394	0	0	0	0	0.712	0	0	0.698	0.909
IL5RA	JAK2	9606.ENSP00000412209	9606.ENSP00000371067	0	0	0	0	0	0.294	0.9	0.44	0.957
ITGA4	VCAN	9606.ENSP00000380227	9606.ENSP00000265077	0	0	0	0	0	0.342	0	0.144	0.412
JAK2	STAT1	9606.ENSP00000371067	9606.ENSP00000354394	0	0	0	0	0.096	0.432	0.9	0.973	0.998
JAK2	QKI	9606.ENSP00000371067	9606.ENSP00000355094	0	0	0	0	0.13	0.052	0.9	0	0.91
JAK2	KDM7A	9606.ENSP00000371067	9606.ENSP00000380692	0	0	0	0	0.065	0.095	0.9	0	0.907
KDM7A	QKI	9606.ENSP00000380692	9606.ENSP00000355094	0	0	0	0	0.061	0	0.9	0	0.902
LSM8	SNAPC3	9606.ENSP00000249299	9606.ENSP00000370200	0	0	0	0	0	0	0	0.432	0.432
MYL4	TMOD2	9606.ENSP00000347055	9606.ENSP00000249700	0	0	0	0	0.063	0	0.9	0.043	0.902
MYL4	MYOM2	9606.ENSP00000347055	9606.ENSP00000262113	0	0	0	0	0.112	0	0	0.512	0.548
MYL4	OBSCN	9606.ENSP00000347055	9606.ENSP00000455507	0	0	0	0	0.085	0.371	0	0.41	0.631
MYL4	MYLK	9606.ENSP00000347055	9606.ENSP00000353452	0	0	0	0	0.08	0.192	0.6	0.894	0.964
OAS1	TNFSF10	9606.ENSP00000388001	9606.ENSP00000241261	0	0	0	0	0.253	0	0	0.356	0.498
OAS1	SAMD9L	9606.ENSP00000388001	9606.ENSP00000326247	0	0	0	0	0.634	0	0	0.387	0.766
OAS1	STAT1	9606.ENSP00000388001	9606.ENSP00000354394	0	0	0	0	0.68	0	0	0.675	0.891
PARP14	STAT1	9606.ENSP00000418194	9606.ENSP00000354394	0	0	0	0	0.668	0.08	0	0.287	0.763
PARP14	ZBP1	9606.ENSP00000418194	9606.ENSP00000360215	0	0	0	0	0.489	0	0	0.127	0.534
SAMD9L	TNFSF10	9606.ENSP00000326247	9606.ENSP00000241261	0	0	0	0	0.533	0	0	0.104	0.563
SAMD9L	STAT1	9606.ENSP00000326247	9606.ENSP00000354394	0	0	0	0	0.782	0	0	0.223	0.824
STAT1	TNFSF10	9606.ENSP00000354394	9606.ENSP00000241261	0	0	0	0	0.229	0	0	0.446	0.554
STAT1	ZBP1	9606.ENSP00000354394	9606.ENSP00000360215	0	0	0	0	0.386	0	0	0.212	0.496
STAT1	TLR6	9606.ENSP00000354394	9606.ENSP00000389600	0	0	0	0	0.061	0.083	0	0.591	0.617
TLR6	TNFSF10	9606.ENSP00000389600	9606.ENSP00000241261	0	0	0	0	0.069	0	0	0.389	0.406
TLR6	VCAN	9606.ENSP00000389600	9606.ENSP00000265077	0	0	0	0	0	0.085	0.9	0.464	0.946
TLR6	ZBP1	9606.ENSP00000389600	9606.ENSP00000360215	0	0	0	0	0.084	0	0	0.388	0.415
USP15	USP8	9606.ENSP00000280377	9606.ENSP00000379721	0	0	0	0.629	0.14	0.117	0	0.764	0.43

## Sheet: supplementary table5
Top 10 in network string_interactions.tsv_2 ranked by MCC method
Rank	Name	Score
1	STAT1	1322
2	DDX58	1321
3	IFIH1	1320
4	IFI16	961
5	DDX60	960
6	OAS1	840
6	SAMD9L	840
8	ZBP1	361
9	TLR6	242
10	TNFSF10	241

## Sheet: supplementary table6
ONTOLOGY	ID	Description	GeneRatio	BgRatio	pvalue	p.adjust	qvalue	geneID	Count
BP	GO:0051607	defense response to virus	44386	258/18866	2.90096e-12	1.16908e-09	4.33616e-10	STAT1/DDX58/IFIH1/IFI16/DDX60/OAS1/ZBP1	7
BP	GO:0009615	response to virus	44386	349/18866	2.43566e-11	4.90786e-09	1.82034e-09	STAT1/DDX58/IFIH1/IFI16/DDX60/OAS1/ZBP1	7
BP	GO:0032481	positive regulation of type I interferon production	44325	74/18866	1.00726e-10	1.35309e-08	5.01863e-09	STAT1/DDX58/IFIH1/IFI16/ZBP1	5
BP	GO:0001819	positive regulation of cytokine production	44386	447/18866	1.38282e-10	1.39319e-08	5.16736e-09	STAT1/DDX58/IFIH1/IFI16/DDX60/ZBP1/TLR6	7
BP	GO:0032479	regulation of type I interferon production	44325	125/18866	1.45328e-09	1.05774e-07	3.92318e-08	STAT1/DDX58/IFIH1/IFI16/ZBP1	5
BP	GO:0032606	type I interferon production	44325	127/18866	1.5748e-09	1.05774e-07	3.92318e-08	STAT1/DDX58/IFIH1/IFI16/ZBP1	5
BP	GO:0032727	positive regulation of interferon-alpha production	44264	20/18866	8.52321e-08	4.90693e-06	1.81999e-06	STAT1/DDX58/IFIH1	3
BP	GO:0032647	regulation of interferon-alpha production	44264	25/18866	1.71754e-07	8.65212e-06	3.20909e-06	STAT1/DDX58/IFIH1	3
BP	GO:0032607	interferon-alpha production	44264	27/18866	2.18322e-07	9.77599e-06	3.62594e-06	STAT1/DDX58/IFIH1	3
BP	GO:0039528	cytoplasmic pattern recognition receptor signaling pathway in response to virus	44264	31/18866	3.35187e-07	1.3508e-05	5.01017e-06	DDX58/IFIH1/DDX60	3
BP	GO:0002831	regulation of response to biotic stimulus	44325	409/18866	5.48144e-07	2.0082e-05	7.44846e-06	STAT1/DDX58/IFI16/DDX60/ZBP1	5
BP	GO:0060759	regulation of response to cytokine stimulus	44295	196/18866	1.36677e-06	4.59006e-05	1.70246e-05	STAT1/DDX58/IFIH1/ZBP1	4
BP	GO:0002221	pattern recognition receptor signaling pathway	44295	201/18866	1.51121e-06	4.68475e-05	1.73759e-05	DDX58/IFIH1/DDX60/TLR6	4
BP	GO:0060760	positive regulation of response to cytokine stimulus	44264	57/18866	2.16838e-06	6.24183e-05	2.31511e-05	DDX58/IFIH1/ZBP1	3
BP	GO:0098586	cellular response to virus	44264	65/18866	3.23082e-06	8.68014e-05	3.21949e-05	DDX58/IFIH1/DDX60	3
BP	GO:0002753	cytoplasmic pattern recognition receptor signaling pathway	44264	68/18866	3.70421e-06	9.32998e-05	3.46051e-05	DDX58/IFIH1/DDX60	3
BP	GO:0050688	regulation of defense response to virus	44264	78/18866	5.60956e-06	0.00013298	4.93224e-05	STAT1/DDX58/DDX60	3
BP	GO:0032755	positive regulation of interleukin-6 production	44264	88/18866	8.0722e-06	0.000180728	6.70323e-05	DDX58/IFIH1/TLR6	3
BP	GO:0039530	MDA-5 signaling pathway	44236	10/18866	9.0855e-06	0.000192708	7.14759e-05	IFIH1/DDX60	2
BP	GO:0060337	type I interferon signaling pathway	44264	95/18866	1.01648e-05	0.000195067	7.2351e-05	STAT1/OAS1/ZBP1	3
BP	GO:0071357	cellular response to type I interferon	44264	95/18866	1.01648e-05	0.000195067	7.2351e-05	STAT1/OAS1/ZBP1	3
BP	GO:0034340	response to type I interferon	44264	99/18866	1.15075e-05	0.000210797	7.81851e-05	STAT1/OAS1/ZBP1	3
BP	GO:0048525	negative regulation of viral process	44264	104/18866	1.33444e-05	0.000233818	8.67236e-05	STAT1/IFI16/OAS1	3
BP	GO:0031349	positive regulation of defense response	44295	385/18866	1.98387e-05	0.000333125	0.000123557	IFI16/DDX60/ZBP1/TLR6	4
BP	GO:0071360	cellular response to exogenous dsRNA	44236	17/18866	2.74109e-05	0.000441863	0.000163888	DDX58/IFIH1	2
BP	GO:0071359	cellular response to dsRNA	44236	22/18866	4.65006e-05	0.000709588	0.000263188	DDX58/IFIH1	2
BP	GO:0032675	regulation of interleukin-6 production	44264	159/18866	4.75406e-05	0.000709588	0.000263188	DDX58/IFIH1/TLR6	3
BP	GO:0035458	cellular response to interferon-beta	44236	23/18866	5.09166e-05	0.000732836	0.000271811	STAT1/IFI16	2
BP	GO:0032635	interleukin-6 production	44264	170/18866	5.80245e-05	0.00080634	0.000299074	DDX58/IFIH1/TLR6	3
BP	GO:0039529	RIG-I signaling pathway	44236	25/18866	6.03456e-05	0.000810642	0.000300669	DDX58/DDX60	2
BP	GO:0002230	positive regulation of defense response to virus by host	44236	29/18866	8.15869e-05	0.00106063	0.00039339	STAT1/DDX58	2
BP	GO:0032728	positive regulation of interferon-beta production	44236	30/18866	8.73929e-05	0.0011006	0.000408217	DDX58/IFIH1	2
BP	GO:0035456	response to interferon-beta	44236	32/18866	9.95987e-05	0.00121631	0.000451133	STAT1/IFI16	2
BP	GO:0050792	regulation of viral process	44264	217/18866	0.000119791	0.00141987	0.000526635	STAT1/IFI16/OAS1	3
BP	GO:0043903	regulation of symbiotic process	44264	231/18866	0.000144141	0.00165968	0.00061558	STAT1/IFI16/OAS1	3
BP	GO:0050691	regulation of defense response to virus by host	44236	40/18866	0.000156317	0.00174988	0.000649036	STAT1/DDX58	2
BP	GO:0002833	positive regulation of response to biotic stimulus	44264	251/18866	0.000184222	0.00197678	0.000733193	IFI16/DDX60/ZBP1	3
BP	GO:0043122	regulation of I-kappaB kinase/NF-kappaB signaling	44264	252/18866	0.000186396	0.00197678	0.000733193	STAT1/TLR6/TNFSF10	3
BP	GO:0043330	response to exogenous dsRNA	44236	46/18866	0.000207113	0.00212572	0.000788436	DDX58/IFIH1	2
BP	GO:0030522	intracellular receptor signaling pathway	44264	265/18866	0.000216208	0.00212572	0.000788436	DDX58/IFIH1/DDX60	3
BP	GO:0032480	negative regulation of type I interferon production	44236	47/18866	0.000216265	0.00212572	0.000788436	DDX58/IFIH1	2
BP	GO:0032648	regulation of interferon-beta production	44236	48/18866	0.000225611	0.0021648	0.000802928	DDX58/IFIH1	2
BP	GO:0032608	interferon-beta production	44236	50/18866	0.000244891	0.00229514	0.000851274	DDX58/IFIH1	2
BP	GO:0007249	I-kappaB kinase/NF-kappaB signaling	44264	286/18866	0.000270648	0.00246522	0.000914358	STAT1/TLR6/TNFSF10	3
BP	GO:0043331	response to dsRNA	44236	53/18866	0.000275273	0.00246522	0.000914358	DDX58/IFIH1	2
BP	GO:0045088	regulation of innate immune response	44264	307/18866	0.000333305	0.00292004	0.00108305	STAT1/IFI16/ZBP1	3
BP	GO:0045071	negative regulation of viral genome replication	44236	61/18866	0.000364843	0.00312833	0.00116031	IFI16/OAS1	2
BP	GO:0001818	negative regulation of cytokine production	44264	360/18866	0.000531402	0.00446156	0.0016548	DDX58/IFIH1/TLR6	3
BP	GO:1903901	negative regulation of viral life cycle	44236	86/18866	0.000724193	0.00595611	0.00220914	IFI16/OAS1	2
BP	GO:0060333	interferon-gamma-mediated signaling pathway	44236	91/18866	0.000810369	0.00653158	0.00242258	STAT1/OAS1	2
BP	GO:0032677	regulation of interleukin-8 production	44236	93/18866	0.000846164	0.00668636	0.00247999	DDX58/TLR6	2
BP	GO:0062207	regulation of pattern recognition receptor signaling pathway	44236	99/18866	0.000958076	0.00742509	0.00275398	DDX60/TLR6	2
BP	GO:0045069	regulation of viral genome replication	44236	100/18866	0.000977387	0.00743183	0.00275648	IFI16/OAS1	2
BP	GO:0032637	interleukin-8 production	44236	101/18866	0.000996885	0.00743972	0.00275941	DDX58/TLR6	2
BP	GO:0032611	interleukin-1 beta production	44236	106/18866	0.00109719	0.0080394	0.00298183	IFI16/TLR6	2
BP	GO:0002697	regulation of immune effector process	44264	470/18866	0.00115382	0.00830337	0.00307974	STAT1/DDX58/DDX60	3
BP	GO:0032612	interleukin-1 production	44236	121/18866	0.00142606	0.0100825	0.00373963	IFI16/TLR6	2
BP	GO:0019079	viral genome replication	44236	127/18866	0.00156928	0.0109038	0.00404425	IFI16/OAS1	2
BP	GO:0002218	activation of innate immune response	44236	144/18866	0.00201093	0.0137357	0.0050946	IFI16/ZBP1	2
BP	GO:2001056	positive regulation of cysteine-type endopeptidase activity	44236	151/18866	0.00220807	0.0148309	0.00550082	IFI16/TNFSF10	2
BP	GO:1903900	regulation of viral life cycle	44236	157/18866	0.0023841	0.0156914	0.00581999	IFI16/OAS1	2
BP	GO:0050729	positive regulation of inflammatory response	44236	158/18866	0.00241407	0.0156914	0.00581999	ZBP1/TLR6	2
BP	GO:0010950	positive regulation of endopeptidase activity	44236	181/18866	0.0031526	0.0199718	0.00740757	IFI16/TNFSF10	2
BP	GO:0071346	cellular response to interferon-gamma	44236	182/18866	0.00318684	0.0199718	0.00740757	STAT1/OAS1	2
BP	GO:0001959	regulation of cytokine-mediated signaling pathway	44236	183/18866	0.00322125	0.0199718	0.00740757	STAT1/ZBP1	2
BP	GO:0043123	positive regulation of I-kappaB kinase/NF-kappaB signaling	44236	188/18866	0.00339597	0.020736	0.00769103	TLR6/TNFSF10	2
BP	GO:0010952	positive regulation of peptidase activity	44236	201/18866	0.00387071	0.0231633	0.00859133	IFI16/TNFSF10	2
BP	GO:0034341	response to interferon-gamma	44236	202/18866	0.00390845	0.0231633	0.00859133	STAT1/OAS1	2
BP	GO:0045089	positive regulation of innate immune response	44236	213/18866	0.004335	0.0253189	0.00939084	IFI16/ZBP1	2
BP	GO:0002699	positive regulation of immune effector process	44236	223/18866	0.00474083	0.0259303	0.00961761	DDX58/DDX60	2
BP	GO:0034135	regulation of toll-like receptor 2 signaling pathway	44205	10/18866	0.00476139	0.0259303	0.00961761	TLR6	1
BP	GO:0071104	response to interleukin-9	44205	10/18866	0.00476139	0.0259303	0.00961761	STAT1	1
BP	GO:0072203	cell proliferation involved in metanephros development	44205	10/18866	0.00476139	0.0259303	0.00961761	STAT1	1
BP	GO:2000659	regulation of interleukin-1-mediated signaling pathway	44205	10/18866	0.00476139	0.0259303	0.00961761	ZBP1	1
BP	GO:0070106	interleukin-27-mediated signaling pathway	44205	11/18866	0.00523642	0.0263785	0.00978384	STAT1	1
BP	GO:0070339	response to bacterial lipopeptide	44205	11/18866	0.00523642	0.0263785	0.00978384	TLR6	1
BP	GO:0070757	interleukin-35-mediated signaling pathway	44205	11/18866	0.00523642	0.0263785	0.00978384	STAT1	1
BP	GO:0071220	cellular response to bacterial lipoprotein	44205	11/18866	0.00523642	0.0263785	0.00978384	TLR6	1
BP	GO:0071221	cellular response to bacterial lipopeptide	44205	11/18866	0.00523642	0.0263785	0.00978384	TLR6	1
BP	GO:0140052	cellular response to oxidised low-density lipoprotein particle stimulus	44205	11/18866	0.00523642	0.0263785	0.00978384	TLR6	1
BP	GO:2000116	regulation of cysteine-type endopeptidase activity	44236	239/18866	0.00542562	0.0269941	0.0100122	IFI16/TNFSF10	2
BP	GO:0002730	regulation of dendritic cell cytokine production	44205	12/18866	0.00571125	0.0274004	0.0101629	DDX58	1
BP	GO:0032490	detection of molecule of bacterial origin	44205	12/18866	0.00571125	0.0274004	0.0101629	TLR6	1
BP	GO:0070269	pyroptosis	44205	12/18866	0.00571125	0.0274004	0.0101629	ZBP1	1
BP	GO:0002371	dendritic cell cytokine production	44205	13/18866	0.00618587	0.027699	0.0102736	DDX58	1
BP	GO:0003337	mesenchymal to epithelial transition involved in metanephros morphogenesis	44205	13/18866	0.00618587	0.027699	0.0102736	STAT1	1
BP	GO:0032493	response to bacterial lipoprotein	44205	13/18866	0.00618587	0.027699	0.0102736	TLR6	1
BP	GO:0032725	positive regulation of granulocyte macrophage colony-stimulating factor production	44205	13/18866	0.00618587	0.027699	0.0102736	DDX58	1
BP	GO:0060340	positive regulation of type I interferon-mediated signaling pathway	44205	13/18866	0.00618587	0.027699	0.0102736	ZBP1	1
BP	GO:0072182	regulation of nephron tubule epithelial cell differentiation	44205	13/18866	0.00618587	0.027699	0.0102736	STAT1	1
BP	GO:0051091	positive regulation of DNA-binding transcription factor activity	44236	270/18866	0.00687468	0.0296414	0.0109941	DDX58/TLR6	2
BP	GO:0032645	regulation of granulocyte macrophage colony-stimulating factor production	44205	15/18866	0.00713452	0.0296414	0.0109941	DDX58	1
BP	GO:0034134	toll-like receptor 2 signaling pathway	44205	15/18866	0.00713452	0.0296414	0.0109941	TLR6	1
BP	GO:0072075	metanephric mesenchyme development	44205	15/18866	0.00713452	0.0296414	0.0109941	STAT1	1
BP	GO:0072160	nephron tubule epithelial cell differentiation	44205	15/18866	0.00713452	0.0296414	0.0109941	STAT1	1
BP	GO:0097202	activation of cysteine-type endopeptidase activity	44205	15/18866	0.00713452	0.0296414	0.0109941	IFI16	1
BP	GO:1900225	regulation of NLRP3 inflammasome complex assembly	44205	15/18866	0.00713452	0.0296414	0.0109941	TLR6	1
BP	GO:0016579	protein deubiquitination	44236	283/18866	0.0075296	0.0297694	0.0110415	DDX58/IFIH1	2
BP	GO:0032868	response to insulin	44236	283/18866	0.0075296	0.0297694	0.0110415	STAT1/TNFSF10	2
BP	GO:0010940	positive regulation of necrotic cell death	44205	16/18866	0.00760854	0.0297694	0.0110415	ZBP1	1
BP	GO:0032604	granulocyte macrophage colony-stimulating factor production	44205	16/18866	0.00760854	0.0297694	0.0110415	DDX58	1
BP	GO:0051770	positive regulation of nitric-oxide synthase biosynthetic process	44205	16/18866	0.00760854	0.0297694	0.0110415	STAT1	1
BP	GO:0072283	metanephric renal vesicle morphogenesis	44205	16/18866	0.00760854	0.0297694	0.0110415	STAT1	1
BP	GO:0007250	activation of NF-kappaB-inducing kinase activity	44205	17/18866	0.00808237	0.0298825	0.0110835	TLR6	1
BP	GO:0016045	detection of bacterium	44205	17/18866	0.00808237	0.0298825	0.0110835	TLR6	1
BP	GO:0044546	NLRP3 inflammasome complex assembly	44205	17/18866	0.00808237	0.0298825	0.0110835	TLR6	1
BP	GO:0090185	negative regulation of kidney development	44205	17/18866	0.00808237	0.0298825	0.0110835	STAT1	1
BP	GO:1903209	positive regulation of oxidative stress-induced cell death	44205	17/18866	0.00808237	0.0298825	0.0110835	TLR6	1
BP	GO:1905331	negative regulation of morphogenesis of an epithelium	44205	17/18866	0.00808237	0.0298825	0.0110835	STAT1	1
BP	GO:0070646	protein modification by small protein removal	44236	300/18866	0.00842748	0.0308752	0.0114517	DDX58/IFIH1	2
BP	GO:0007221	positive regulation of transcription of Notch receptor target	44205	18/18866	0.00855599	0.0310636	0.0115216	STAT1	1
BP	GO:0039535	regulation of RIG-I signaling pathway	44205	19/18866	0.0090294	0.0311013	0.0115355	DDX60	1
BP	GO:0061081	positive regulation of myeloid leukocyte cytokine production involved in immune response	44205	19/18866	0.0090294	0.0311013	0.0115355	DDX58	1
BP	GO:0072074	kidney mesenchyme development	44205	19/18866	0.0090294	0.0311013	0.0115355	STAT1	1
BP	GO:0072077	renal vesicle morphogenesis	44205	19/18866	0.0090294	0.0311013	0.0115355	STAT1	1
BP	GO:0098543	detection of other organism	44205	19/18866	0.0090294	0.0311013	0.0115355	TLR6	1
BP	GO:2000696	regulation of epithelial cell differentiation involved in kidney development	44205	19/18866	0.0090294	0.0311013	0.0115355	STAT1	1
BP	GO:0051767	nitric-oxide synthase biosynthetic process	44205	20/18866	0.00950262	0.0311346	0.0115479	STAT1	1
BP	GO:0051769	regulation of nitric-oxide synthase biosynthetic process	44205	20/18866	0.00950262	0.0311346	0.0115479	STAT1	1
BP	GO:0060231	mesenchymal to epithelial transition	44205	20/18866	0.00950262	0.0311346	0.0115479	STAT1	1
BP	GO:0072087	renal vesicle development	44205	20/18866	0.00950262	0.0311346	0.0115479	STAT1	1
BP	GO:0072234	metanephric nephron tubule development	44205	20/18866	0.00950262	0.0311346	0.0115479	STAT1	1
BP	GO:1900409	positive regulation of cellular response to oxidative stress	44205	20/18866	0.00950262	0.0311346	0.0115479	TLR6	1
BP	GO:0072111	cell proliferation involved in kidney development	44205	21/18866	0.00997564	0.0324208	0.012025	STAT1	1
BP	GO:0032069	regulation of nuclease activity	44205	22/18866	0.0104485	0.0331553	0.0122974	OAS1	1
BP	GO:0039531	regulation of viral-induced cytoplasmic pattern recognition receptor signaling pathway	44205	22/18866	0.0104485	0.0331553	0.0122974	DDX60	1
BP	GO:1902884	positive regulation of response to oxidative stress	44205	22/18866	0.0104485	0.0331553	0.0122974	TLR6	1
BP	GO:0019058	viral life cycle	44236	341/18866	0.0107826	0.0333424	0.0123668	IFI16/OAS1	2
BP	GO:0072170	metanephric tubule development	44205	23/18866	0.0109211	0.0333424	0.0123668	STAT1	1
BP	GO:0072215	regulation of metanephros development	44205	23/18866	0.0109211	0.0333424	0.0123668	STAT1	1
BP	GO:0072243	metanephric nephron epithelium development	44205	23/18866	0.0109211	0.0333424	0.0123668	STAT1	1
BP	GO:1900017	positive regulation of cytokine production involved in inflammatory response	44205	23/18866	0.0109211	0.0333424	0.0123668	TLR6	1
BP	GO:0098581	detection of external biotic stimulus	44205	24/18866	0.0113935	0.0345231	0.0128047	TLR6	1
BP	GO:0002053	positive regulation of mesenchymal cell proliferation	44205	25/18866	0.0118657	0.0351609	0.0130412	STAT1	1
BP	GO:0060330	regulation of response to interferon-gamma	44205	25/18866	0.0118657	0.0351609	0.0130412	STAT1	1
BP	GO:0060334	regulation of interferon-gamma-mediated signaling pathway	44205	25/18866	0.0118657	0.0351609	0.0130412	STAT1	1
BP	GO:0072202	cell differentiation involved in metanephros development	44205	26/18866	0.0123377	0.0360297	0.0133635	STAT1	1
BP	GO:0072273	metanephric nephron morphogenesis	44205	26/18866	0.0123377	0.0360297	0.0133635	STAT1	1
BP	GO:0045862	positive regulation of proteolysis	44236	370/18866	0.0126064	0.0360996	0.0133894	IFI16/TNFSF10	2
BP	GO:0060544	regulation of necroptotic process	44205	27/18866	0.0128095	0.0360996	0.0133894	ZBP1	1
BP	GO:0062098	regulation of programmed necrotic cell death	44205	27/18866	0.0128095	0.0360996	0.0133894	ZBP1	1
BP	GO:0072207	metanephric epithelium development	44205	27/18866	0.0128095	0.0360996	0.0133894	STAT1	1
BP	GO:1903203	regulation of oxidative stress-induced neuron death	44205	27/18866	0.0128095	0.0360996	0.0133894	TLR6	1
BP	GO:0090200	positive regulation of release of cytochrome c from mitochondria	44205	28/18866	0.0132811	0.0371687	0.013786	TNFSF10	1
BP	GO:0043032	positive regulation of macrophage activation	44205	29/18866	0.0137526	0.0382226	0.0141769	TLR6	1
BP	GO:0035666	TRIF-dependent toll-like receptor signaling pathway	44205	30/18866	0.0142238	0.0387309	0.0143654	TLR6	1
BP	GO:0036475	neuron death in response to oxidative stress	44205	30/18866	0.0142238	0.0387309	0.0143654	TLR6	1
BP	GO:0061082	myeloid leukocyte cytokine production	44205	30/18866	0.0142238	0.0387309	0.0143654	DDX58	1
BP	GO:1901653	cellular response to peptide	44236	398/18866	0.0144884	0.0391866	0.0145344	STAT1/TLR6	2
BP	GO:0003338	metanephros morphogenesis	44205	33/18866	0.0156362	0.0416087	0.0154328	STAT1	1
BP	GO:0010464	regulation of mesenchymal cell proliferation	44205	33/18866	0.0156362	0.0416087	0.0154328	STAT1	1
BP	GO:0002756	MyD88-independent toll-like receptor signaling pathway	44205	34/18866	0.0161066	0.0416087	0.0154328	TLR6	1
BP	GO:0002888	positive regulation of myeloid leukocyte mediated immunity	44205	34/18866	0.0161066	0.0416087	0.0154328	DDX58	1
BP	GO:0045648	positive regulation of erythrocyte differentiation	44205	34/18866	0.0161066	0.0416087	0.0154328	STAT1	1
BP	GO:0055094	response to lipoprotein particle	44205	34/18866	0.0161066	0.0416087	0.0154328	TLR6	1
BP	GO:0070102	interleukin-6-mediated signaling pathway	44205	34/18866	0.0161066	0.0416087	0.0154328	STAT1	1
BP	GO:0050727	regulation of inflammatory response	44236	425/18866	0.0164131	0.0419666	0.0155655	ZBP1/TLR6	2
BP	GO:0060338	regulation of type I interferon-mediated signaling pathway	44205	35/18866	0.0165768	0.0419666	0.0155655	ZBP1	1
BP	GO:0110111	negative regulation of animal organ morphogenesis	44205	35/18866	0.0165768	0.0419666	0.0155655	STAT1	1
BP	GO:0030099	myeloid cell differentiation	44236	431/18866	0.0168552	0.0419666	0.0155655	STAT1/IFI16	2
BP	GO:0002755	MyD88-dependent toll-like receptor signaling pathway	44205	36/18866	0.0170468	0.0419666	0.0155655	TLR6	1
BP	GO:0009595	detection of biotic stimulus	44205	36/18866	0.0170468	0.0419666	0.0155655	TLR6	1
BP	GO:0071402	cellular response to lipoprotein particle stimulus	44205	36/18866	0.0170468	0.0419666	0.0155655	TLR6	1
BP	GO:0052548	regulation of endopeptidase activity	44236	434/18866	0.0170782	0.0419666	0.0155655	IFI16/TNFSF10	2
BP	GO:0032717	negative regulation of interleukin-8 production	44205	37/18866	0.0175167	0.0425254	0.0157728	TLR6	1
BP	GO:0062208	positive regulation of pattern recognition receptor signaling pathway	44205	37/18866	0.0175167	0.0425254	0.0157728	DDX60	1
BP	GO:0010742	macrophage derived foam cell differentiation	44205	38/18866	0.0179863	0.0425612	0.0157861	STAT1	1
BP	GO:0030224	monocyte differentiation	44205	38/18866	0.0179863	0.0425612	0.0157861	IFI16	1
BP	GO:0090077	foam cell differentiation	44205	38/18866	0.0179863	0.0425612	0.0157861	STAT1	1
BP	GO:1903131	mononuclear cell differentiation	44205	38/18866	0.0179863	0.0425612	0.0157861	IFI16	1
BP	GO:0043434	response to peptide hormone	44236	447/18866	0.0180595	0.0425612	0.0157861	STAT1/TNFSF10	2
BP	GO:0051090	regulation of DNA-binding transcription factor activity	44236	455/18866	0.0186753	0.0435813	0.0161644	DDX58/TLR6	2
BP	GO:0006979	response to oxidative stress	44236	458/18866	0.0189086	0.0435813	0.0161644	STAT1/TLR6	2
BP	GO:0010939	regulation of necrotic cell death	44205	40/18866	0.0189249	0.0435813	0.0161644	ZBP1	1
BP	GO:0072210	metanephric nephron development	44205	40/18866	0.0189249	0.0435813	0.0161644	STAT1	1
BP	GO:1902042	negative regulation of extrinsic apoptotic signaling pathway via death domain receptors	44205	41/18866	0.0193939	0.0444076	0.0164709	TNFSF10	1
BP	GO:0052547	regulation of peptidase activity	44236	466/18866	0.0195368	0.044482	0.0164985	IFI16/TNFSF10	2
BP	GO:0031667	response to nutrient levels	44236	473/18866	0.0200938	0.0454933	0.0168736	STAT1/IFI16	2
BP	GO:0010463	mesenchymal cell proliferation	44205	44/18866	0.0207998	0.0465815	0.0172772	STAT1	1
BP	GO:0034122	negative regulation of toll-like receptor signaling pathway	44205	45/18866	0.021268	0.0465815	0.0172772	TLR6	1
BP	GO:0042771	intrinsic apoptotic signaling pathway in response to DNA damage by p53 class mediator	44205	45/18866	0.021268	0.0465815	0.0172772	IFI16	1
BP	GO:0045429	positive regulation of nitric oxide biosynthetic process	44205	45/18866	0.021268	0.0465815	0.0172772	TLR6	1
BP	GO:0070266	necroptotic process	44205	45/18866	0.021268	0.0465815	0.0172772	ZBP1	1
BP	GO:1904646	cellular response to amyloid-beta	44205	45/18866	0.021268	0.0465815	0.0172772	TLR6	1
BP	GO:1904407	positive regulation of nitric oxide metabolic process	44205	46/18866	0.021736	0.0473492	0.0175619	TLR6	1
BP	GO:0035850	epithelial cell differentiation involved in kidney development	44205	47/18866	0.0222038	0.0481083	0.0178435	STAT1	1
BP	GO:0042149	cellular response to glucose starvation	44205	49/18866	0.0231389	0.0492915	0.0182823	IFI16	1
BP	GO:0090199	regulation of release of cytochrome c from mitochondria	44205	49/18866	0.0231389	0.0492915	0.0182823	TNFSF10	1
BP	GO:0001774	microglial cell activation	44205	50/18866	0.0236061	0.0492915	0.0182823	TLR6	1
BP	GO:0001961	positive regulation of cytokine-mediated signaling pathway	44205	50/18866	0.0236061	0.0492915	0.0182823	ZBP1	1
BP	GO:0002269	leukocyte activation involved in inflammatory response	44205	50/18866	0.0236061	0.0492915	0.0182823	TLR6	1
BP	GO:0045646	regulation of erythrocyte differentiation	44205	50/18866	0.0236061	0.0492915	0.0182823	STAT1	1
BP	GO:0097300	programmed necrotic cell death	44205	50/18866	0.0236061	0.0492915	0.0182823	ZBP1	1
MF	GO:0003725	double-stranded RNA binding	44326	76/18352	2.64222e-10	1.24184e-08	5.84069e-09	DDX58/IFIH1/DDX60/OAS1/ZBP1	5
MF	GO:0003724	RNA helicase activity	44265	77/18352	8.34378e-06	0.000196079	9.22207e-05	DDX58/IFIH1/DDX60	3
MF	GO:0003727	single-stranded RNA binding	44265	90/18352	1.33504e-05	0.000209156	9.83712e-05	DDX58/IFIH1/DDX60	3
MF	GO:0004386	helicase activity	44265	160/18352	7.46152e-05	0.000876729	0.000412347	DDX58/IFIH1/DDX60	3
MF	GO:0005164	tumor necrosis factor receptor binding	44237	31/18352	0.000123223	0.00115829	0.000544774	STAT1/TNFSF10	2
MF	GO:0032813	tumor necrosis factor receptor superfamily binding	44237	48/18352	0.000297441	0.00232995	0.00109583	STAT1/TNFSF10	2
MF	GO:0140098	catalytic activity, acting on RNA	44265	390/18352	0.00102265	0.00686636	0.00322942	DDX58/IFIH1/DDX60	3
MF	GO:0016887	ATPase activity	44265	423/18352	0.00129323	0.0075977	0.00357339	DDX58/IFIH1/DDX60	3
MF	GO:0071723	lipopeptide binding	44206	10/18352	0.00543699	0.0283931	0.013354	TLR6	1
MF	GO:0035325	Toll-like receptor binding	44206	12/18352	0.00652118	0.0303525	0.0142755	TLR6	1
MF	GO:0003953	NAD+ nucleosidase activity	44206	16/18352	0.00868639	0.0303525	0.0142755	TLR6	1
MF	GO:0050135	NAD(P)+ nucleosidase activity	44206	16/18352	0.00868639	0.0303525	0.0142755	TLR6	1
MF	GO:0061809	NAD+ nucleotidase, cyclic ADP-ribose generating	44206	16/18352	0.00868639	0.0303525	0.0142755	TLR6	1
MF	GO:0005126	cytokine receptor binding	44237	271/18352	0.00904117	0.0303525	0.0142755	STAT1/TNFSF10	2
MF	GO:0044389	ubiquitin-like protein ligase binding	44237	316/18352	0.0121395	0.0380372	0.0178898	STAT1/DDX58	2
MF	GO:0000979	RNA polymerase II core promoter sequence-specific DNA binding	44206	24/18352	0.0130041	0.0381995	0.0179662	STAT1	1
MF	GO:0035035	histone acetyltransferase binding	44206	28/18352	0.0151566	0.0419034	0.0197082	STAT1	1
MF	GO:0070566	adenylyltransferase activity	44206	31/18352	0.0167681	0.0428067	0.020133	OAS1	1
MF	GO:0051721	protein phosphatase 2A binding	44206	32/18352	0.0173048	0.0428067	0.020133	STAT1	1
MF	GO:0016799	hydrolase activity, hydrolyzing N-glycosyl compounds	44206	34/18352	0.0183774	0.0431868	0.0203118	TLR6	1

## Sheet: supplementary table7
ID	Description	GeneRatio	BgRatio	pvalue	p.adjust	qvalue	geneID	Count
hsa05164	Influenza A	44324	172/8105	2.16052e-07	8.85812e-06	5.913e-06	6772/23586/64135/4938/8743	5
hsa05162	Measles	44294	139/8105	5.49872e-06	0.000112724	7.52457e-05	6772/23586/64135/4938	4
hsa05171	Coronavirus disease - COVID-19	44294	232/8105	4.18371e-05	0.000571774	0.000381672	6772/23586/64135/4938	4
hsa05160	Hepatitis C	44263	157/8105	0.00037181	0.0027864	0.00185998	6772/23586/4938	3
hsa04217	Necroptosis	44263	159/8105	0.000385934	0.0027864	0.00185998	6772/81030/8743	3
hsa05161	Hepatitis B	44263	162/8105	0.000407766	0.0027864	0.00185998	6772/23586/64135	3
hsa04621	NOD-like receptor signaling pathway	44263	181/8105	0.000564794	0.00330808	0.00220822	6772/3428/4938	3
hsa05169	Epstein-Barr virus infection	44263	202/8105	0.00077873	0.00368139	0.00245741	6772/23586/4938	3
hsa05168	Herpes simplex virus 1 infection	44294	498/8105	0.00080811	0.00368139	0.00245741	6772/23586/64135/4938	4
hsa04623	Cytosolic DNA-sensing pathway	44235	63/8105	0.00161564	0.00662413	0.00442176	23586/81030	2
hsa04622	RIG-I-like receptor signaling pathway	44235	70/8105	0.00199093	0.00742074	0.00495351	23586/64135	2
hsa04620	Toll-like receptor signaling pathway	44235	104/8105	0.0043418	0.0148345	0.00990235	6772/10333	2
hsa05152	Tuberculosis	44235	180/8105	0.0125765	0.0396643	0.0264768	6772/10333	2

## Sheet: supplementary table8
ID	Description	setSize	enrichmentScore	NES	pvalue	p.adjust	qvalues	rank	leading_edge	core_enrichment
hsa05168	Herpes simplex virus 1 infection	470	0.328132	1.68455	2.93131e-07	9.58537e-05	8.42365e-05	7234	tags=51%, list=37%, signal=33%	23586/64135/5610/6672/4938/4940/5500/4939/355/3665/3107/3442/7097/7773/7639/329/353088/81931/55762/55786/7752/5290/79818/63934/79898/6940/55769/374879/7567/330/23118/6772/7562/3460/199704/841/3592/10929/3106/6890/7699/162655/7189/90592/100129543/6773/80264/7551/90649/90594/163131/51710/90576/727/7637/171392/9668/4792/1147/29110/158431/10793/170960/284370/284371/7673/342892/27102/140612/59348/7587…
hsa04512	ECM-receptor interaction	72	-0.3936	-1.95101	3.57012e-05	0.00583714	0.00512969	3850	tags=49%, list=20%, signal=39%	3909/1605/7448/3696/7143/5649/1285/3680/10319/3911/255743/1284/3695/3691/8516/3694/3679/9900/3339/7057/51206/7450/2811/1299/22801/3674/3690/2812/3693/1293/1292/3655/2815/3914/2814
hsa04120	Ubiquitin mediated proteolysis	137	0.389489	1.79511	7.05751e-05	0.00695574	0.00611272	4925	tags=40%, list=25%, signal=30%	23327/23291/64326/7321/4193/6500/26091/6921/7323/329/10477/672/8452/140739/11065/4214/55284/326/9320/330/8881/8916/8554/4281/7189/9246/51366/51465/55294/8450/4734/29945/10393/10054/25847/9354/9039/9063/89910/83737/6477/1161/57448/92912/3093/11059/10277/55958/8065/26272/55236/7325/9690/8454/25898
hsa04621	NOD-like receptor signaling pathway	157	0.373767	1.74603	8.50855e-05	0.00695574	0.00611272	5364	tags=43%, list=28%, signal=32%	4938/4940/100506742/440068/4939/5586/3665/114548/22900/257397/3428/3576/3442/329/118429/23710/10010/140609/11345/330/23118/6772/841/55669/5594/7189/6773/84674/114769/10135/4792/1147/29110/834/837/54822/2633/55914/5027/8767/1432/8737/10910/596/9140/1508/90550/3709/9474/2634/6347/6041/6885/51135/3606/2919/387/7158/11035/3320/9447/3454/5600/10392/2635/115361/115362/7124
hsa04622	RIG-I-like receptor signaling pathway	56	0.477689	1.91991	0.000214526	0.01403	0.0123296	3833	tags=45%, list=20%, signal=36%	23586/64135/3665/1654/3576/3442/7706/4214/10010/1540/841/3592/9636/7189/4792/1147/29110/79132/1432/8737/9140/9474/64343/80143/6885
hsa05160	Hepatitis C	136	0.371154	1.70824	0.000346478	0.018883	0.0165945	3021	tags=30%, list=16%, signal=26%	23586/4600/5610/4938/4940/91543/4939/355/3665/3434/4599/3442/137075/5290/9071/3845/5894/3949/6772/6655/5520/841/8554/5594/7189/6773/5519/6654/5010/8837/4792/1147/5925/29110/673/6256/27102/8737/10197/55844/317
hsa05132	Salmonella infection	240	0.30953	1.50844	0.000561417	0.0262262	0.0230476	5793	tags=43%, list=30%, signal=30%	10333/114548/23643/257397/3576/7097/6500/347733/197259/329/6281/9475/375189/5868/5290/5788/5894/6416/8743/330/51143/23118/5289/841/51626/7100/113146/5594/7189/3836/3840/1783/84617/51164/3799/4792/1147/834/837/4646/8767/1432/8737/114609/5606/5286/10096/8976/6993/596/79659/51209/54106/9648/11258/653857/5420/5608/5609/3831/27072/5869/9367/302/10097/6885/10000/83439/51135/10640/5058/382/6990/3606/836…
hsa05414	Dilated cardiomyopathy	75	-0.348491	-1.75518	0.000741383	0.030304	0.0266313	3727	tags=40%, list=19%, signal=32%	1605/112/3696/7171/7042/3680/9254/7040/7043/3695/3691/111/781/783/8516/3694/109/3679/2010/7273/22801/3674/3690/1756/3693/487/7169/489/3655/6547
hsa05412	Arrhythmogenic right ventricular cardiomyopathy	67	-0.342343	-1.66681	0.00126148	0.0458337	0.0402788	2369	tags=33%, list=12%, signal=29%	9254/3695/3691/781/783/8516/3694/3679/2010/22801/3674/51176/3690/1496/1756/3693/487/489/3655/6932/6547/89
hsa04510	Focal adhesion	183	-0.25842	-1.50511	0.00149167	0.0487776	0.0428659	3615	tags=33%, list=19%, signal=27%	5881/7448/29780/3696/7143/3265/25759/208/5649/1285/340156/5880/5578/3680/4636/10319/7791/3911/85366/1950/23396/2064/207/1284/3695/1729/3691/896/7424/8516/3694/3679/5156/2318/7057/3480/10398/5829/5293/7450/56924/87/1299/22801/3674/3690/54776/7423/2317/2316/4638/998/7094/7414/3693/1293/1292/3655/3914/5154/2324

## Sheet: supplementary table9
ID	Description	setSize	enrichmentScore	NES	pvalue	p.adjust	qvalues	rank	leading_edge	core_enrichment
hsa05168	Herpes simplex virus 1 infection	470	0.351874	1.64568	2.18566e-10	7.08153e-08	5.59068e-08	9123	tags=63%, list=47%, signal=34%	5500/64135/4938/3107/3460/6772/6672/5290/4939/6773/7562/199704/51710/3717/1147/90592/374879/7637/93474/355/3665/5610/55769/330/162655/7773/163131/90576/65243/284323/10780/6940/347344/23586/29110/7699/596/5781/140612/7551/340252/836/81931/7556/23118/684/9668/345462/57547/7587/284390/6428/6890/329/388561/117608/91661/6885/4940/400720/6432/727/126068/127396/147929/342892/9310/158431/284371/284349/90…
hsa05014	Amyotrophic lateral sclerosis	324	0.368109	1.70027	6.26566e-09	1.01504e-06	8.01345e-07	9678	tags=72%, list=50%, signal=36%	29979/143471/10010/9896/26100/100506742/834/9818/4710/80208/22863/4709/847/9821/5608/51164/5706/3799/29110/596/836/514/7979/201625/203228/4747/53371/283/9167/55255/5600/6428/6396/4698/90550/55860/5683/4729/5532/57122/25978/11258/6391/6432/30849/23435/5687/5685/23064/1965/79902/4697/4719/515/8678/4708/10213/1349/5682/5289/4704/3181/6392/220988/5707/81929/5700/4686/5684/5718/522/509/27089/3084/1012…
hsa00190	Oxidative phosphorylation	108	0.469486	2.02264	5.40382e-08	5.83613e-06	4.60747e-06	9049	tags=81%, list=47%, signal=44%	4710/8992/4709/514/5464/9167/523/4698/1353/4729/6391/10632/4697/4719/51382/515/4708/1349/10063/4704/6392/528/522/509/51606/27089/7381/4720/4711/4712/6390/9550/4702/4724/7385/27068/4726/341947/539/1355/9551/4722/7388/1347/498/4701/535/506/9296/440567/90423/4725/1350/29796/23545/1345/4700/4706/7384/7386/126328/9377/4714/1352/1329/374291/10476/526/518/4728/529/4718/1537/4717/4694/521/4705/1351/4707/…
hsa04714	Thermogenesis	201	0.379729	1.71679	2.60197e-06	0.000196192	0.000154888	8649	tags=66%, list=45%, signal=37%	8110/116228/4710/3845/4709/2182/51422/514/5562/9167/5600/4893/55471/4698/1353/6655/4729/6391/6654/6198/10632/4697/4719/6604/515/4708/51241/5565/1349/10063/137682/86/6197/4704/493753/6392/10818/5468/788/522/509/27089/388753/1374/285521/7381/4720/4711/6009/4712/6390/1432/55744/4702/4724/7385/4726/55811/1386/341947/539/1355/4217/65260/9551/5564/4722/90639/8193/4881/7388/1347/498/4701/1385/79133/6595…
hsa04621	NOD-like receptor signaling pathway	157	0.393201	1.74837	3.02765e-06	0.000196192	0.000154888	4111	tags=40%, list=21%, signal=32%	4938/114548/10010/6772/114769/84674/3428/4939/6773/100506742/834/5027/8767/1147/140609/2633/837/10910/3665/330/54822/55669/440068/29110/9474/596/3606/23118/9140/5600/329/90550/3320/257397/6885/4940/387/1536/2635/9447/115361/3709/8737/10392/1508/2634/7189/25828/5586/7187/1432/115362/7124/10059/7417/79184/58484/7419/22900/4615/2920/7531/9641
hsa05016	Huntington disease	268	0.350102	1.60557	4.38967e-06	0.000204404	0.000161372	9839	tags=71%, list=51%, signal=36%	143471/26100/4710/22863/7019/4709/9821/51164/5706/3799/836/514/7979/201625/9167/4698/55860/5683/4729/1213/11258/6391/30849/5687/5685/6667/4697/4719/5440/515/8678/4708/6507/2776/10213/1349/55081/5682/5289/4704/6392/5468/5707/5700/3066/5684/5718/522/509/27089/10121/5688/10540/7381/5978/4720/4711/4712/6390/55102/5719/4702/54205/7417/4724/5689/7385/4726/341947/7419/539/4217/163/4722/3831/55567/27019/…
hsa03013	RNA transport	157	0.390831	1.73783	4.41614e-06	0.000204404	0.000161372	9843	tags=76%, list=51%, signal=38%	59343/11260/9818/1979/1977/53371/10209/8662/57187/23191/51068/6396/26019/2332/11171/57122/5411/23435/9939/8894/1965/8087/79902/8669/8672/51095/55520/81929/4686/7919/1207/10799/11102/55916/1978/9669/1983/387082/8487/11218/6613/80145/1974/23279/9086/9631/5903/96764/8661/1967/3646/10605/9984/65109/10775/2733/2521/10284/3837/8893/6612/10073/8667/23165/1982/1968/5901/54913/7175/79023/8892/55706/8668/1…
hsa04512	ECM-receptor interaction	72	-0.331095	-1.98968	9.59993e-06	0.000388797	0.000306945	2820	tags=40%, list=15%, signal=35%	1284/3909/7057/3680/8516/3694/255743/7143/1299/3339/3691/3655/5649/2811/9900/2812/3690/22801/3674/1293/2814/51206/1285/3696/7450/3693/2815/1292/3914
hsa05020	Prion disease	238	0.347452	1.58459	1.77858e-05	0.00064029	0.000505492	9611	tags=71%, list=50%, signal=36%	143471/5290/100506742/4710/4709/5706/3799/775/836/514/7979/9167/5621/5600/4698/90550/5683/4729/5532/6391/1536/727/5687/5685/1965/4697/4719/515/4708/3709/10213/1457/1349/5682/3305/4704/6392/5707/5700/5684/5718/5291/522/509/27089/5688/7381/4720/4711/4712/6390/1432/5719/4702/7124/54205/7417/4724/5689/7385/4726/5533/1386/341947/7419/714/539/5879/4722/3831/317/713/9861/7388/1347/116443/5530/498/7416/4…
hsa05169	Epstein-Barr virus infection	186	0.360618	1.62	2.39718e-05	0.000776685	0.000613172	7048	tags=50%, list=36%, signal=32%	4938/3107/6772/960/5290/4939/6773/5925/1147/7431/355/3665/5610/5608/965/5706/23586/29110/596/958/836/7979/23118/3516/5600/6890/6885/4940/4794/9541/51426/10213/6416/695/8819/8737/29760/4609/7874/5707/3109/5700/9636/1643/3066/5718/5291/578/3122/7097/1021/7189/7187/3627/4193/1432/5719/7124/54205/79685/898/5879/4615/3113/9641/3135/317/6891/890/9861/3106/3108/22938/3111/3280/5701/10379/5713/567/6850/3…
hsa03040	Spliceosome	133	0.390794	1.71575	2.97038e-05	0.000874913	0.00069072	7146	tags=59%, list=37%, signal=37%	57461/10569/55660/988/51691/57187/6428/9716/10285/51639/1655/6629/6432/29896/9939/51362/6627/11157/51503/6637/10772/84950/23350/5356/3192/3305/11017/27316/7307/25949/220988/10915/1665/6636/6430/4686/102724594/7919/8559/10946/23658/55119/6434/55696/9129/6426/5093/84844/153527/6632/6429/9879/22938/9984/25766/2521/10907/51340/10286/6634/6431/3190/4670/84991/6635/11325/8683/9343/6427/23451/58517/5511…
hsa03050	Proteasome	45	0.487889	1.85791	0.000105447	0.00284708	0.00224769	8059	tags=82%, list=42%, signal=48%	143471/5706/7979/51371/5683/5687/5685/10213/5682/23198/5696/3458/5707/5700/5684/5718/5721/5698/5688/5719/5689/5720/9861/5701/5690/5713/5695/5686/5694/5717/10197/5692/5714/5691/5699/5702/5705
hsa05022	Pathways of neurodegeneration - multiple diseases	417	0.303347	1.41433	0.00016211	0.00404028	0.0031897	9692	tags=62%, list=50%, signal=32%	143471/10010/9896/8323/26100/100506742/51465/7855/805/4710/9246/80208/22863/3845/4709/355/847/9821/5608/51164/5706/3799/55669/29110/596/775/836/514/7979/201625/203228/4747/91860/9167/5621/55255/5600/4893/53349/4698/90550/55860/5683/4729/5532/25978/11258/6391/1536/30849/23435/5687/8321/5685/1965/4697/4719/5664/515/8678/4708/3709/2776/10213/1457/840/1349/55081/5682/1452/5289/4704/6392/120892/5707/7…
hsa04120	Ubiquitin mediated proteolysis	137	0.367605	1.61757	0.000360238	0.00833694	0.0065818	6563	tags=53%, list=34%, signal=35%	6921/7321/4214/7323/51465/23291/9246/9039/11065/26091/330/4281/1161/25847/64326/8881/8452/3093/29945/7325/329/9320/23327/11059/8450/672/8454/55284/26272/55236/10393/5371/8554/55958/7324/51366/140739/57448/8065/1643/9690/9354/7189/25898/9616/4193/7334/7319/389898/10477/8453/64750/7337/9978/7428/991/89910/9063/4591/22954/55120/326/51434/7322/6500/54926/8945/8916/51619/4734/7332/246184
hsa03460	Fanconi anemia pathway	54	0.451717	1.76283	0.000405732	0.00856135	0.00675896	7042	tags=61%, list=36%, signal=39%	675/84126/5429/80010/83990/6119/378708/672/55215/51426/545/7398/353497/57599/51455/5888/641/5980/4292/2189/116028/2187/2067/2072/3280/55120/2177/79008/29089/79728/57697/2188/11201
hsa05132	Salmonella infection	240	0.323913	1.47845	0.000422783	0.00856135	0.00675896	7096	tags=49%, list=37%, signal=32%	8743/114548/5290/113146/834/9475/6993/8767/1147/6281/837/330/3836/5788/5608/51164/3799/302/8976/197259/596/3606/836/5286/23118/23643/10109/23191/5600/329/55860/3320/257397/51626/6885/387/6990/11258/55207/10096/10097/5898/10094/3839/840/6416/4074/8737/5289/6934/27072/1783/10392/4609/3840/9367/8797/10640/1781/5291/578/7097/10121/10540/7189/25828/382/10333/1434/103910/10552/1432/114609/7124/54205/58…
hsa04140	Autophagy - animal	132	0.373432	1.63741	0.000521648	0.00994201	0.00784895	3527	tags=37%, list=18%, signal=31%	10010/26100/5290/3920/22863/1612/3845/9821/22808/51100/29110/9474/7405/596/10325/84938/203228/9140/5562/55255/55578/64422/4893/83734/53349/6885/5516/30849/6198/55014/3091/1965/8678/5515/64121/5289/10533/1514/3476/10670/64419/1508/440275/5291/3146/7189/6009/115201/55102
hsa04622	RIG-I-like receptor signaling pathway	56	0.440657	1.73679	0.000579591	0.0104326	0.00823629	4163	tags=45%, list=21%, signal=35%	64135/10010/4214/1147/3665/1540/64343/23586/29110/9474/9140/5600/6885/80143/79132/8737/843/9636/7189/7187/3627/1432/7124/9641/1654
hsa05160	Hepatitis C	136	0.35897	1.58005	0.000650249	0.0110884	0.00875404	4111	tags=37%, list=21%, signal=29%	137075/4938/6772/5290/4939/6773/5925/1147/3845/355/3665/5610/5520/23586/29110/4599/836/4893/4940/6655/5516/6654/5519/1965/5515/55844/8554/8737/91543/4609/3458/440275/7532/5291/578/10062/1021/7189/1366/4600/7187/3627/10971/7124/7098/54205/3434/100506658/7531/9641
hsa05203	Viral carcinogenesis	160	0.34844	1.55224	0.000779374	0.0126259	0.00996778	8643	tags=59%, list=45%, signal=33%	3107/5366/6672/5290/5925/3845/3665/5610/2957/85477/836/2961/3516/3572/4893/5423/2965/1030/387/5966/55869/983/2959/5922/728340/7874/5700/7532/3066/2960/5291/578/2966/1021/7187/4193/10971/1739/1111/1386/898/7419/79885/5879/7531/1654/3135/890/7337/3106/991/22938/1029/1385/5315/9519/10488/10379/5567/1237/8841/1959/6850/2958/1960/718/2967/3190/7188/4055/7534/5902/4790/1017/3065/9134/11036/4792/64764/7…
hsa03440	Homologous recombination	41	0.46417	1.75521	0.00119615	0.017104	0.0135031	7868	tags=68%, list=41%, signal=41%	675/5890/4683/5932/83990/6119/7979/84142/672/11073/4361/50511/10111/5888/10714/641/580/79184/8438/7516/6742/472/5893/79728/9577/51720/29935/57804
hsa05010	Alzheimer disease	325	0.295908	1.36735	0.00122415	0.017104	0.0135031	9839	tags=65%, list=51%, signal=32%	143471/6868/8323/26100/5290/100506742/7855/805/102/4710/22863/1147/3845/4709/355/5610/9821/5706/3799/775/836/514/7979/91860/9167/4893/4698/90550/5683/4729/5532/6391/1536/30849/5687/8321/5685/1965/4697/4719/5664/515/8678/4708/3709/57142/2776/10213/1457/840/1349/5682/1452/5289/3416/4704/6392/5707/7473/5700/1435/4040/5684/5718/5291/522/509/27089/5688/7381/4720/4711/3643/4712/23621/6390/824/55102/571…
hsa05012	Parkinson disease	218	0.324708	1.47472	0.00122783	0.017104	0.0135031	9611	tags=67%, list=50%, signal=34%	143471/51465/805/4710/9246/4709/4780/5706/3799/55669/836/514/7979/91860/9167/4698/90550/5683/4729/6391/5687/5685/1965/4697/4719/515/4708/3709/10213/2773/1349/5682/4704/6392/120892/5707/5700/5684/5718/522/509/27089/5688/25828/7381/4720/4711/4712/6390/5719/4702/54205/7417/4724/5689/7385/4726/341947/7419/539/4217/4722/3831/163688/317/9861/7388/1347/498/7416/4701/506/440567/5701/5690/22926/817/5713/5…
hsa05322	Systemic lupus erythematosus	45	0.445396	1.69609	0.00126843	0.017104	0.0135031	6066	tags=53%, list=31%, signal=37%	942/6737/958/2209/727/3586/3458/3109/6741/3122/940/7124/714/717/3113/6632/713/3108/3111/712/2214/6634/718/3117
hsa03018	RNA degradation	73	0.400516	1.63392	0.00142701	0.017104	0.0135031	8788	tags=74%, list=45%, signal=41%	87178/54464/219988/84186/22894/1656/51691/118460/57472/5214/11157/4848/80153/9652/10438/170506/27257/131870/10950/80349/3329/154197/23658/23517/25904/29883/22803/5393/115752/4850/9337/11044/255967/54512/3313/9125/51010/5073/23019/23404/11340/246175/2023/10200/64282/23016/27258/10140/9924/5042/8761/5213/196513/5394
hsa00280	Valine, leucine and isoleucine degradation	45	0.443383	1.68843	0.00148475	0.017104	0.0135031	9418	tags=82%, list=49%, signal=42%	217/3157/38/1738/5095/10449/3032/26275/39/11112/3030/549/4329/64087/5096/34/1892/3155/56922/1962/65985/1629/5019/259307/84693/224/35/586/18/197322/36/593/30/223/3033/3028/219
hsa00900	Terpenoid backbone biosynthesis	21	0.554086	1.79145	0.0014874	0.017104	0.0135031	4141	tags=62%, list=21%, signal=49%	2342/9453/3157/3156/10269/38/3422/23590/116150/2339/57107/39/79947
hsa04145	Phagosome	134	0.345419	1.51746	0.00153091	0.017104	0.0135031	6847	tags=51%, list=35%, signal=33%	3107/22925/3920/2213/8992/3685/1520/53407/8417/23673/948/9554/3688/9341/2209/523/8411/6890/64581/1536/9103/51382/4074/5289/200576/1514/1783/528/3109/1781/81035/51606/23480/3122/7097/8685/10333/9550/4481/51143/7060/30835/5879/3113/2204/3135/6891/3106/3108/535/9296/3111/79659/90423/5868/23545/2214/4360/718/7879/3117/7037/347733/10952/84617/653361/821/526
hsa04932	Non-alcoholic fatty liver disease	138	0.349046	1.53632	0.00153091	0.017104	0.0135031	8644	tags=61%, list=45%, signal=34%	5290/4710/4709/355/836/51422/5562/9167/4698/4729/6391/1965/4697/4719/4708/840/5565/1349/4704/6392/5291/27089/10062/7381/4720/4711/3643/4712/6390/4702/7124/54205/4724/7385/4726/341947/4217/5879/5564/4722/7388/1347/4701/79602/440567/6945/4725/1350/29796/1345/4700/4706/7384/7386/126328/9377/4714/1329/374291/9451/4790/10000/4728/4718/1537/4717/4694/4705/1351/4707/581/468/83737/4715/4731/5599/3576/625…
hsa03420	Nucleotide excision repair	46	0.440911	1.68251	0.00164558	0.0176052	0.0138989	6358	tags=59%, list=33%, signal=40%	1161/6119/902/2965/5887/5983/8450/5985/56655/4331/5981/728340/5982/1643/2966/1022/10714/5111/2074/9978/2067/2072/2071/5984/404672/2967/100533467
hsa01240	Biosynthesis of cofactors	131	0.355011	1.55403	0.00168445	0.0176052	0.0138989	8118	tags=58%, list=42%, signal=34%	8836/8564/493911/80025/129607/654364/64802/6697/217/221264/29922/3242/27235/79646/55191/27010/1738/3620/7358/1371/133686/53354/55312/102157402/205/10201/1719/27430/84274/10797/5805/51109/7360/2730/10243/1355/9054/4522/7366/25902/50808/4144/125061/10327/11019/8942/200895/5315/2643/211/23057/7389/4338/204/2990/4830/8566/79717/29926/1352/210/29968/154807/7390/224/57026/55163/554235/169355/5373/2729/…
hsa00590	Arachidonic acid metabolism	42	-0.321573	-1.71754	0.00174945	0.0177131	0.0139841	1456	tags=29%, list=8%, signal=26%	100137049/2053/1573/5742/1558/239/4056/8398/242/5730/27306/8644
hsa04142	Lysosome	123	0.358301	1.55956	0.00187057	0.0183656	0.0144992	9082	tags=67%, list=47%, signal=36%	427/9179/26503/3920/5538/3074/1520/8763/23431/27074/411/8905/8546/950/10947/9741/1213/4891/1203/1522/26985/968/1512/2581/256471/2799/4074/2519/4126/1514/1176/6272/1508/5660/51606/10577/2760/4668/9583/1075/164/2517/535/1200/1519/967/8692/2629/2990/23545/1174/1211/1497/1509/285362/1201/51172/53/8906/55353/130340/162/8907/8218/1515/2720/7805/1513/3073/175/5476/23659/10239/3988/10717/54/22901/537/812…
hsa04141	Protein processing in endoplasmic reticulum	162	0.335255	1.49663	0.00198936	0.0189574	0.0149664	9947	tags=68%, list=51%, signal=33%	7321/29979/7323/100506742/51465/3301/5610/4780/55768/596/26270/7353/64215/9871/55757/6396/3320/5887/201595/10294/8454/54431/1965/23190/55666/27248/51009/10427/3305/6747/9373/10484/55829/440275/7993/9532/23480/578/23471/30001/824/51360/11231/51726/10905/51128/4217/7095/10808/3998/4287/8720/9978/56605/6400/10802/10130/55741/5611/10961/10483/10956/56681/22926/29978/7184/7322/258010/6500/79139/51619/…
hsa05415	Diabetic cardiomyopathy	175	0.332495	1.48949	0.00217309	0.0197027	0.0155548	9839	tags=70%, list=51%, signal=35%	5500/25874/5290/4710/4709/948/514/7046/9167/5600/4698/4729/6391/1536/5166/6667/4697/4719/515/4708/1349/5501/7137/9882/4704/2673/6392/51660/5291/522/509/27089/7381/4720/4711/3643/4712/6390/1432/4702/7417/4724/7385/4726/341947/7419/5160/539/5879/5579/4722/5162/7388/1347/498/7416/4701/2998/506/440567/2936/817/4725/1350/29796/1345/4700/488/5728/4706/7384/7386/1509/1281/126328/1376/9377/4714/1329/3742…
hsa04620	Toll-like receptor signaling pathway	90	0.373925	1.58123	0.00220853	0.0197027	0.0155548	4111	tags=38%, list=21%, signal=30%	6772/5290/942/1147/3665/5608/29110/958/23118/23643/5600/51284/1326/6885/353376/6373/6416/8737/7096/51311/5291/7097/7189/10333/7187/3627/1432/114609/7124/7098/4283/5879/4615/9641
hsa03022	Basal transcription factors	42	0.453305	1.71541	0.00225	0.0197027	0.0155548	6333	tags=62%, list=33%, signal=42%	6879/6880/2957/6882/2961/902/2965/6884/4331/2969/2959/728340/6873/2960/2966/1022/51616/27097/2963/2071/9519/404672/2958/6877/2967/129685
hsa04136	Autophagy - other	31	0.481744	1.7298	0.00265116	0.0226046	0.0178458	3527	tags=48%, list=18%, signal=40%	26100/9474/84938/9140/64422/83734/5516/30849/8678/5515/5289/10533/3476/115201/55102
hsa05131	Shigellosis	214	0.315041	1.42843	0.00284457	0.0233606	0.0184426	3695	tags=32%, list=19%, signal=26%	7321/114548/8936/960/831/7323/26100/5290/834/23291/9475/22863/8767/1147/837/1398/6093/3688/29110/9474/8976/596/3606/10325/7336/113026/23118/9140/10109/5600/257397/6885/1793/387/3098/30849/6198/10096/10097/8454/10094/92610/11335/8678/3709/115004/8737/64121/5289/10392/10670/7307/8915/102724594/5291/7189/382/103910/4193/7334/824/10552/1432/7124/54205/389898/3611/58484
hsa01200	Carbon metabolism	103	0.362461	1.5539	0.00292582	0.0233606	0.0184426	9224	tags=71%, list=48%, signal=37%	847/5723/3417/4200/38/6391/3098/1738/5214/5095/2098/5634/26275/6392/2746/8801/6390/39/4190/8802/5160/4329/5162/2271/1743/83440/5223/5230/1737/5226/128/5315/5096/84076/2203/113675/1892/8803/51/2747/7167/3419/3101/1431/84693/29968/6120/441531/3099/2023/283871/2875/3418/7086/35/2597/2806/84706/26007/9563/10993/5213/8310/6472/6389/8277/2805/48/3420/50/4967/25796/4191
hsa05164	Influenza A	153	0.333316	1.48422	0.00295612	0.0233606	0.0184426	8533	tags=57%, list=44%, signal=32%	8743/64135/4938/114548/3460/6772/103/5290/4939/6773/834/3717/1147/355/3665/5610/3836/23586/29110/3606/4599/836/51284/4940/1965/5371/3459/8766/91543/3458/3109/8797/5291/578/3122/1021/4600/23633/7187/3627/3838/7124/7098/54205/55916/3841/4615/5579/3113/9641/7177/317/3108/7416/5611/3111/10379/5604/8106/7706/3117/7514/29108/6041/148022/4790/10000/292/4261/10898/3442/5646/2224/3115/3592/4792/90865/6347…
hsa05152	Tuberculosis	159	0.327005	1.45557	0.00303659	0.0234251	0.0184935	8533	tags=53%, list=44%, signal=30%	3460/6772/22925/3920/2213/805/3717/8767/1520/596/3606/836/2209/91860/5600/8411/5532/387/64581/9103/2207/1054/3586/3459/843/5289/7096/8915/3458/3109/51606/3122/7097/7189/10333/4801/3329/1432/114609/7124/54205/5533/30835/4615/3113/163688/317/3108/5530/4800/535/1385/3111/4802/817/5868/972/3313/23545/2214/6850/4360/718/7879/3117/1509/7421/4790/10000/4261/3442/10892/3115/3592/8844/5993/5894/581/2215/2…
hsa01524	Platinum drug resistance	67	0.401276	1.61901	0.00421705	0.031775	0.0250855	5123	tags=48%, list=26%, signal=35%	5366/5290/5429/1317/355/330/4257/596/836/653689/329/4436/672/9446/4259/7153/4258/5291/578/4193/7155/54205/4437/5980/538/4217/317/4292/332/1029/2941/2067
hsa00640	Propanoate metabolism	33	0.472489	1.7156	0.00432866	0.0318747	0.0251642	8861	tags=79%, list=46%, signal=43%	31/38/1738/55862/5095/26275/8801/39/3030/8802/3939/4329/5096/32/1892/8803/51/1962/160287/1629/84693/35/18/8310/3945/593
hsa04217	Necroptosis	119	0.343046	1.48843	0.00614023	0.0442096	0.0349023	3824	tags=34%, list=20%, signal=27%	8743/51510/114548/3460/6772/6773/834/3717/355/5610/330/1540/54822/197259/596/81030/8605/5321/329/3320/51652/25978/1536/353376/57132/3459/29082/8737/3458/8797/3146/2746/9525/824/7124/7098/10059/7417/246/7419
hsa05161	Hepatitis B	149	0.322346	1.43003	0.00684512	0.0482135	0.0380633	4955	tags=36%, list=26%, signal=27%	64135/2185/4214/6772/5290/6773/100506742/5925/3717/1147/3845/355/3665/5608/23586/29110/596/836/7046/23118/5600/4893/6885/6655/6654/353376/6416/843/4609/1643/5291/7097/7189/7187/10971/1432/114609/7124/7098/54205/1386/898/5111/7419/4615/5579/9641/1654/673/317/890/4089/332/1385
hsa04218	Cellular senescence	151	0.322776	1.43537	0.00699474	0.0482191	0.0380677	7048	tags=46%, list=36%, signal=29%	5500/3107/5290/23291/805/5925/4683/144715/286826/10114/3845/22808/5608/54822/7046/91860/5600/4893/90550/1030/5532/59341/4361/993/983/545/3709/11200/5501/4609/10111/9133/5291/1021/2305/6009/4193/824/1432/7417/3364/1111/1978/5533/898/7419/163688/3135/890/3106/5530/7416/1029/23411/6237/4605/472/5928/5604/5728/147746/8945/4790/1871/5481/1017/10000/292/9134

## Sheet: supplementary table10
ID	Description	setSize	enrichmentScore	NES	pvalue	p.adjust	qvalues	rank	leading_edge	core_enrichment
hsa03010	Ribosome	132	-0.515654	-2.51108	1e-10	3.27e-08	3.16842e-08	5773	tags=58%, list=30%, signal=41%	6231/6173/6232/63875/6135/6159/6171/55168/6158/55052/6125/3921/6146/6210/6165/51081/6203/6207/6152/10573/6133/54460/6202/79590/11224/6205/6235/6167/6144/6217/2197/64981/6124/6206/6176/6227/6230/6189/6168/4736/6156/6233/6204/6228/6193/6208/6222/6183/25873/51073/6134/124995/6224/6209/6130/6143/6136/6169/23521/6132/6161/6194/6223/6188/6137/100526842/6147/6187/9045/6142/6122/6181/6234/6141/6191/6157
hsa04621	NOD-like receptor signaling pathway	157	0.351514	1.65426	0.000348457	0.0426059	0.0412824	5039	tags=40%, list=26%, signal=30%	440068/100506742/5586/22900/3442/114548/118429/4940/4938/3576/4792/257397/10135/4939/329/3665/11345/23710/5594/6347/3428/841/23118/10010/3454/330/140609/2919/1432/55669/7189/6772/84674/6041/837/114769/834/1147/55914/2634/51135/29110/90550/9140/3709/6773/11035/2633/54822/5027/64127/8767/596/4210/10910/8737/598/5580/1508/9474/4671/10616/7158
hsa05160	Hepatitis C	136	0.357509	1.64687	0.00039088	0.0426059	0.0412824	3580	tags=32%, list=18%, signal=26%	23586/4600/9071/5894/3442/355/91543/5610/4940/4938/5010/4792/3434/6256/4939/8837/4599/3665/137075/6655/5594/841/3845/5290/8554/27102/3454/5520/7189/6772/317/5519/6041/3949/6654/1147/673/7132/1364/10197/5925/29110/6773
